1 **Discovery of novel representatives of bilaterian neuropeptide families and**  
2 **reconstruction of neuropeptide precursor evolution in ophiuroid echinoderms.**

3

4 Meet Zandawala<sup>1,2,\*</sup>, Ismail Moghul<sup>1,#</sup>, Luis Alfonso Yañez Guerra<sup>1,#</sup>, Jérôme Delroisse<sup>1,#</sup>,  
5 Nikara Abylkassimova<sup>1</sup>, Andrew F. Hugall<sup>3</sup>, Timothy D. O’Hara<sup>3</sup> and Maurice R. Elphick<sup>1,\*</sup>

6

7 Meet Zandawala: [meet.zandawala@zoologi.su.se](mailto:meet.zandawala@zoologi.su.se)

8 Ismail Moghul: [muhammad.moghul.16@ucl.ac.uk](mailto:muhammad.moghul.16@ucl.ac.uk)

9 Luis Alfonso Yañez Guerra: [l.a.yanezguerra@qmul.ac.uk](mailto:l.a.yanezguerra@qmul.ac.uk)

10 Jérôme Delroisse: [jerome.delroisse@umons.ac.be](mailto:jerome.delroisse@umons.ac.be)

11 Nikara Abylkassimova: [abylkassimova@gmail.com](mailto:abylkassimova@gmail.com)

12 Andrew F. Hugall: [ahugall@museum.vic.gov.au](mailto:ahugall@museum.vic.gov.au)

13 Timothy D. O’Hara: [tohara@museum.vic.gov.au](mailto:tohara@museum.vic.gov.au)

14 Maurice R. Elphick: [m.r.elphick@qmul.ac.uk](mailto:m.r.elphick@qmul.ac.uk)

15

16 1. Queen Mary University of London, School of Biological & Chemical Sciences, Mile End  
17 Road, London, E1 4NS, UK

18 2. Present address: Stockholm University, Department of Zoology, Stockholm, Sweden

19 3. Museums Victoria, GPO Box 666, Melbourne, VIC 3001, Australia

20

21 # Contributed equally

22 \* Correspondence to: Prof. M.R. Elphick and Dr. M. Zandawala

23 Tel: 44 207 882 6664

24 Fax: 44 208 983 0973

25 E-mail: [m.r.elphick@qmul.ac.uk](mailto:m.r.elphick@qmul.ac.uk) and [meet.zandawala@zoologi.su.se](mailto:meet.zandawala@zoologi.su.se)

26 **Abstract**

27 Neuropeptides are a diverse class of intercellular signaling molecules that mediate neuronal  
28 regulation of many physiological and behavioural processes. Recent advances in  
29 genome/transcriptome sequencing are enabling identification of neuropeptide precursor  
30 proteins in species from a growing variety of animal taxa, providing new insights into the  
31 evolution of neuropeptide signaling. Here detailed analysis of transcriptome sequence data  
32 from three brittle star species, *Ophionotus victoriae*, *Amphiura filiformis* and *Ophiopsila*  
33 *aranaea*, has enabled the first comprehensive identification of neuropeptide precursors in the  
34 class Ophiuroidea of the phylum Echinodermata. Representatives of over thirty bilaterian  
35 neuropeptide precursor families were identified, some of which occur as paralogs.  
36 Furthermore, homologs of endothelin/CCHamide, eclosion hormone, neuropeptide-F/Y and  
37 nucleobinin/nesfatin were discovered here in a deuterostome/echinoderm for the first time.  
38 The majority of ophiuroid neuropeptide precursors contain a single copy of a neuropeptide,  
39 but several precursors comprise multiple copies of identical or non-identical, but structurally-  
40 related, neuropeptides. Here we performed an unprecedented investigation of the evolution of  
41 neuropeptide copy-number over a period of ~270 million years by analysing sequence data  
42 from over fifty ophiuroid species, with reference to a robust phylogeny. Our analysis  
43 indicates that the composition of neuropeptide “cocktails” is functionally important, but with  
44 plasticity over long evolutionary time scales.

45

46 **Keywords (3 to 6):**

47 Neuropeptide evolution; brittle star; Ophiuroidea; eclosion hormone; CCHamide;  
48 neuropeptide-Y

49

## 50 **Introduction**

51           The nervous systems of animals utilize a wide variety of chemicals for neuronal  
52 communication. These include amino acids (*e.g.* glutamate), biogenic amines (*e.g.* serotonin),  
53 and neuropeptides (*e.g.* vasopressin) amongst others. Neuropeptides are by far the most-  
54 diverse and they control many physiological/behavioural processes, including feeding,  
55 reproduction and locomotion [1-3]. Recent advances in genome/transcriptome sequencing are  
56 enabling identification of neuropeptide precursor proteins in species from a growing variety  
57 of animal taxa, providing new insights into the evolution of neuropeptide signaling [4-8]. The  
58 echinoderms are notable in this regard because as deuterostomian invertebrates they occupy  
59 an “intermediate” phylogenetic position with respect to the vertebrates and intensely studied  
60 protostomian invertebrates such as insects (*e.g.* *Drosophila melanogaster*) and nematodes  
61 (*e.g.* *Caenorhabditis elegans*). Accordingly, characterisation of neuropeptide signaling  
62 systems in echinoderms has recently provided key “missing links” for determination of  
63 neuropeptide relationships and reconstruction of neuropeptide evolution [8-10].

64           The phylum Echinodermata comprises five extant classes: Echinoidea (sea urchins  
65 and sand dollars), Holothuroidea (sea cucumbers), Asteroidea (starfish), Ophiuroidea (brittle  
66 stars and basket stars) and Crinoidea (sea lilies and feather stars). Recent molecular  
67 phylogenetic studies support the hypothesis that Echinoidea and Holothuroidea are sister  
68 groups (Echinozoa) and Asteroidea and Ophiuroidea are sister groups (Asterozoa), with the  
69 Crinoidea basal to the Echinozoa + Asterozoa clade (Eleutherozoa) [11, 12]. Echinoderms  
70 are marine organisms that have several unique features including pentaradial symmetry as  
71 adults, a remarkable ability to autotomise and regenerate body parts, and neurally-controlled  
72 mutable collagenous tissue [13, 14]. Previous transcriptomic analyses have identified  
73 neuropeptide precursor complements in *Strongylocentrotus purpuratus* (purple sea urchin),  
74 *Apostichopus japonicus* (Japanese sea cucumber) and *Asterias rubens* (common European  
75 starfish) [8, 15, 16]. Furthermore, the identification of neuropeptides in these species has

76 facilitated investigation of the evolution and physiological roles of various neuropeptide  
77 signaling systems [8-10, 17-21].

78 The recent progress in transcriptomic/genomic characterization of echinoderm  
79 neuropeptide systems has hitherto not been extended to ophiuroids or crinoids. The  
80 Ophiuroidea constitutes the largest class among extant echinoderms [22] with a long  
81 evolutionary history that extends back to the early Ordovician (around 480 million years ago)  
82 [23], whilst extant families date from the mid-Permian (~ 270 million years ago) [12].  
83 Available molecular data for ophiuroids has increased significantly in recent years with the  
84 emergence of numerous transcriptomic studies [20, 24-29]. Here, we utilize transcriptome  
85 sequence data from three brittle star species, *Ophionotus victoriae*, *Amphiura filiformis* and  
86 *Ophiopsila aranea* to perform the first comprehensive identification of neuropeptide  
87 precursors in ophiuroids. We identify representatives of over thirty neuropeptide families  
88 including homologs of endothelin/CCHamide, eclosion hormone (EH), neuropeptide-F/Y  
89 (NPF/NPY) and nucleobinin (NUCB)/nesfatin, which are the first to be discovered in a  
90 deuterostome/echinoderm.

91

92 Transcriptomes have also been employed to investigate the phylogenetic relationships  
93 of the ophiuroids, utilising data from fifty-two species [12]. In this the most comprehensive  
94 molecular analysis of ophiuroid phylogeny to date, previous morphology-based classification  
95 schemes [30] were rejected in favour of a new phylogeny comprising three primary ophiuroid  
96 clades [12, 31, 32]. This landmark study and the associated large dataset has provided a  
97 unique opportunity to investigate the conservation and diversification of neuropeptide  
98 precursor structure over a period of ~270 million years of ophiuroid evolution. Our analysis  
99 reveals that the majority of ophiuroid neuropeptide precursors contain a single copy of a  
100 neuropeptide, but several precursors comprise multiple copies of identical or non-identical,  
101 but structurally-related, neuropeptides. Interestingly, the number of neuropeptide copies in  
102 the majority of precursors is constant across all the ophiuroid species examined, but examples

103 of clade-specific losses/gains of neuropeptides are also observed. This remarkable  
104 conservation in neuropeptide copy number across ~270 million years of ophiuroid evolution  
105 indicates that the composition of neuropeptide “cocktails” is functionally important, but with  
106 plasticity over long evolutionary time scales.

## 107 **Results and discussion**

108 Here, we have utilized transcriptome sequence data for the first comprehensive identification  
109 of neuropeptide precursors in ophiuroids (**Figure 1**). Representatives of over thirty bilaterian  
110 neuropeptide precursor families were identified. Identification of ophiuroid representatives of  
111 these neuropeptide precursor types has in some cases provided new insights into neuropeptide  
112 precursor structure and evolution, as discussed in more detail below. First, however, we will  
113 highlight representatives of bilaterian neuropeptide precursor families that have been  
114 identified here for the first time in an echinoderm species.

115

### 116 ***Discovery of the first echinoderm representatives of bilaterian neuropeptide families***

117 Comprehensive analysis of transcriptome sequence data from three ophiuroid species,  
118 *O. victoriae*, *A. filiformis* and *O. aranea*, has enabled the discovery of the first echinoderm  
119 representatives of four bilaterian neuropeptide families. Specifically, we have discovered the  
120 first deuterostomian homologs of eclosion hormone (**Figure 2**), the first ambulacrarian  
121 homolog of CCHamide/endothelin-type peptides (**Figure 3A**), and the first echinoderm  
122 homologs of neuropeptide-Y/neuropeptide-F (**Figure 3B**) and NUCB/nesfatin (**Figure S1**),  
123 as discussed in detail below.

124

### 125 **Eclosion hormone**

126 Eclosion hormone (EH) was first isolated and sequenced in the insects *Manduca sexta*  
127 (tobacco hornworm) and *Bombyx mori* (silk moth) and shown to alter the timing of adult  
128 emergence [33, 34]. EH is one of the main peptide/protein hormones involved in control of  
129 ecdysis (*i.e.* shedding of the cuticle) behavior in arthropods [35, 36]. It binds to and activates  
130 a receptor guanylyl cyclase that is expressed in epitracheal Inka cells and causes the  
131 secondary release of ecdysis-triggering hormone (ETH) that is also expressed in Inka cells  
132 [37, 38]. In *Drosophila*, EH is important for ecdysis but whether this hormone is essential for

133 ecdysis is not yet clear [39, 40]. EH null mutant flies show defects in ecdysis and are unable  
134 to reach adulthood yet some flies in which EH-producing neurons have been genetically  
135 ablated (a more extreme manipulation) are able to survive till adulthood. Arthropod EHs have  
136 six conserved cysteine residues that form three disulfide bridges [37]. EHs have not been  
137 discovered previously outside of arthropods. Interestingly, four EH-like precursors were  
138 identified in *A. filiformis* and *O. aranea* and two in *O. victoriae* (**Figure S2-S4**, GenBank;  
139 MF155236; MF155237). The ophiuroid EH-like precursors are orthologous to neuropeptide  
140 precursors previously identified in the sea-urchin *S. purpuratus* (Spnp11 and Spnp15, which  
141 we now rename as Spur EH1 and Spur EH2, respectively) [16] and the starfish *A. rubens*  
142 (Arnp11, Arnp15 and Arnp15b renamed as Arub EH1, Arub EH2a and Arub EH2b,  
143 respectively) [8]. The positions of cysteine residues are conserved across all echinoderm and  
144 insect EHs, but aside from this there is little sequence conservation (**Figure 2A**). The  
145 echinoderm EH-like precursor sequences were also analysed using a sequence-similarity-  
146 based clustering approach based on BLASTp e-values using CLANS software [41]. The  
147 analysis shows that echinoderm EH-like precursors (i) cluster in two compact subgroups  
148 (echinoderm EH-like precursor 1 and EH-like precursor 2 and (ii) have strong positive  
149 BLAST results with arthropod EHs and, to a lesser extent, with arthropod ion transport  
150 peptide (ITP) and vertebrate atrial natriuretic peptide (ANP) (**Figure 2B**). ITP precursors also  
151 possess six cysteine residues; however, the position of these residues is not conserved with  
152 cysteine residues found in echinoderm EH-like precursors (not shown).

153 To obtain further evidence for the presence of an EH-like signaling system in  
154 echinoderms, we performed a phylogenetic analysis of EH-type receptors. Insect EHs  
155 mediate their effects by binding to membrane guanylyl cyclase receptors [38]. EH receptors  
156 are closely related to vertebrate ANP receptors and various orphan receptors [42]. Specific  
157 BLAST searches enabled identification of transcripts in *O. victoriae*, *A. filiformis* and *O.*  
158 *aranea* that encode proteins similar to arthropod EH receptors. Maximum likelihood and  
159 Bayesian phylogenetic analyses confirmed that these sequences group with the receptor

160 cluster containing EH receptors (**Figure 2C**). The discovery of the first deuterostomian EHs  
161 suggests an ancient bilaterian origin of EHs and indicates that these hormones may have other  
162 functions in invertebrates aside from their role in ecdysis.

163

#### 164 CCHamide

165 CCHamides are neuropeptides that were discovered relatively recently in the  
166 silkworm *Bombyx mori* [43]. Later, it was found that insects have two CCHamide genes,  
167 CCHamide-1 and CCHamide-2, each encoding a single copy of the mature peptide [44].  
168 These peptides are referred to as CCHamides because they contain two cysteine residues and  
169 a characteristic histidine-amide C-terminal motif. There are two CCHamide receptors in  
170 insects: CCHamide-1 specifically activates one receptor and CCHamide-2 specifically  
171 activates the second receptor [44, 45]. CCHamide-1 has a physiological role in starvation-  
172 induced olfactory modifications [46] whereas CCHamide-2 regulates feeding, growth and  
173 developmental timing in flies [45, 47]. Recent studies examining the evolution of  
174 neuropeptides in the Bilateria have shown that protostomian CCHamides are related to  
175 elevenin (another protostomian neuropeptide originally discovered from the mollusc *Aplysia*  
176 *californica* L11 neuron), lophotrochozoan GGNG peptides, endothelins and gastrin-releasing  
177 peptides (GRPs) [6, 7, 48, 49]. The latter two are neuropeptide types that have not been found  
178 outside chordates. Furthermore, the degree of sequence/structural conservation varies across  
179 these different peptide families. Hence, CCHamides are amidated and have a disulphide  
180 bridge, elevenins and endothelins have a disulphide bridge but are non-amidated and GRPs  
181 are amidated but lack the disulphide bridge. Furthermore, CCHamide-1 is located  
182 immediately after the signal peptide whereas there is a dibasic cleavage site separating the  
183 signal peptide and CCHamide-2 [44].

184 Here we have identified two neuropeptide precursors in brittle stars whose sequence  
185 and precursor structure resembles those of lophotrochozoan GGNG peptides and insect  
186 CCHamide-1 (**Figure 3A**). The CCHamide-like precursor 1 (GenBank; MF155229)



187 identified in *O. victoriae* is orthologous to an uncharacterized neuropeptide precursor  
188 (Arnp25) identified previously in the starfish *A. rubens* [8], whereas the CCHamide-like  
189 precursor 2 (GenBank; MF155230) was only found in brittle stars. Both CCHamide-like  
190 precursors in *O. victoriae* comprise a single copy of a putative cyclic amidated peptide that is  
191 flanked by a signal peptide at the N-terminus and a dibasic cleavage site at the C-terminus.  
192 Interestingly, both of these peptides lack a penultimate histidine residue, just like the  
193 lophotrochozoan GGNG peptides (**Figure 3A**) [48, 49].

194

#### 195 Neuropeptide-Y/Neuropeptide-F

196 Neuropeptide-Y (NPY) was first isolated and sequenced from the porcine  
197 hypothalamus in 1982 [50, 51]. Although the NPY/NPF family of peptides are pleiotropic in  
198 nature [52], they are mainly known for their roles in regulation of feeding and stress [3, 53,  
199 54]. The discovery of Neuropeptide-F (NPF) in the tapeworm *Moniezia expansa* in 1991  
200 demonstrated for the first time the occurrence of NPY homologs in invertebrates [55]. Here,  
201 we have identified the first echinoderm representatives of the NPY/NPF family in brittle stars  
202 and starfish (**Figure 3B, Figure S12**). The brittle star precursors contain a peptide with a C-  
203 terminal RYamide, in common with NPY in vertebrates and an ortholog in the starfish  
204 *Patiria miniata*. In contrast, an ortholog in the starfish *A. rubens* has a C-terminal RFamide, a  
205 feature that it shares with NPY/NPF-type peptides in the hemichordate *S. kowalevskii* and in  
206 protostomes. Thus, our findings have revealed that NPY/NPF-type peptides with a C-terminal  
207 Yamide motif are not restricted to vertebrates, as has been shown previously in some insects  
208 [52]. Echinoderm NPY/NPF-type peptides are located immediately after the signal peptide in  
209 the precursor proteins, as is the case in other bilaterian species. Surprisingly, we did not find  
210 NPY/NPF-type precursors in the sea urchin *S. purpuratus* or the sea cucumber *A. japonicus*.  
211 However, we suspect that this may reflect sequence divergence rather than gene loss because  
212 a gene encoding a NPY/NPF-type receptor can be found in the *S. purpuratus* genome [56].

213

214 NUCB

215 Nucleobindins (NUCB1 and NUCB2) are multidomain  $\text{Ca}^{2+}$  and DNA binding  
216 proteins. NUCB1 was first discovered in 1992 and thought to play a role in apoptosis and  
217 autoimmunity [57]. Interestingly, the NUCB1 precursor has both a signal peptide and a  
218 leucine zipper structure suggesting that it can bind DNA and act as an endocrine factor [58].  
219 NUCB2 is a homolog of NUCB1 and was named based on high sequence similarity between  
220 the two precursors [59]. In 2006, an 82 amino acid peptide located in the N-terminal region of  
221 NUCB2 was reported. This peptide, Nesfatin-1 (Nucleobindin-2-Encoded Satiety and FAT-  
222 Influencing protein-1), was discovered as a satiety inducing factor in the rat hypothalamus  
223 [60]. Its role in inhibiting food intake in vertebrates is now well-established [59, 61].  
224 Moreover, this pleiotropic peptide also modulates other processes including glucose and lipid  
225 metabolism, and cardiovascular and reproductive functions. Recently, nesfatin-1-like peptide  
226 derived from NUCB1 was shown to be anorexigenic in goldfish [62]. Surprisingly, the  
227 presence of NUCBs in invertebrates other than *Drosophila* has not been reported until now  
228 [63]. Here, we show that NUCB-type precursors are present in echinoderms (**Figure S1A**).  
229 Phylogenetic analysis of NUCB precursors reveals that a single copy of the NUCB precursor  
230 is found in invertebrate species and gene duplication in the vertebrate lineage gave rise to  
231 NUCB1 and NUCB2 (**Figure S1B**). In chordates, the NUCB precursors are predicted to  
232 generate three peptides (Nesfatin-1, 2 and 3); however, no biological role has been attributed  
233 specifically to nesfatin-2 and nesfatin-3. Interestingly, the prohormone convertase cleavage  
234 sites expected to generate Nesfatin-1, 2 and 3 are conserved between echinoderm and  
235 chordate NUCBs. Moreover, the *O. victoriae* precursor (Genbank; MF155235) has an  
236 additional predicted cleavage site within the Nesfatin-1 containing region, which is not  
237 present in other species (except for *Drosophila melanogaster*). However, it remains to be  
238 determined whether or not this cleavage site in the *O. victoriae* precursor is functional.

239

240 *First comprehensive identification of neuropeptide precursors in ophiuroids*

241 We have identified neuropeptide precursors belonging to 32 families, which  
242 represents the first comprehensive analysis of neuropeptide precursors in ophiuroids (**Figure**  
243 **4; Figure S2-S4**). Several of these neuropeptide families have been identified previously in  
244 echinoderms and include homologs of AN peptides, bursicon ( $\alpha$  and  $\beta$ ) (GenBank;  
245 MF155260; MF155227), calcitonin (GenBank; MF155228), cholecystokinin (CCK)  
246 (GenBank; MF155231; MF155232) [15], corazonin (GenBank; MF155233) [10],  
247 corticotropin-releasing hormone (CRH) (GenBank; MF155234; MF155235, MF155261,  
248 MF155262), glycoprotein hormones ( $\alpha 2$  and  $\beta 5$ ) (GenBank; MF155238; MF155239;  
249 MF155240) [64], gonadotropin-releasing hormone (GnRH) (GenBank; MF155263) [10],  
250 insulin-like peptide (ILP) (GenBank; MF155264) [64], kisspeptin (KP) (GenBank;  
251 MF155241) [8], luqin (GenBank; MF155242) [7], melanin-concentrating hormone (MCH)  
252 (GenBank; MF155243) [8], NG peptides (neuropeptide-S) (GenBank; MF155244) [9, 65],  
253 orexin (GenBank; MF155245; MF155246) [6, 8], pedal peptides (GenBank; MF155247;  
254 MF155266; MF155267) [16], pigment-dispersing factor (PDF) (GenBank; MF155248) [8],  
255 relaxin-like peptide (GenBank; MF155249) [66], SALMFamides (L-type and F-type)  
256 (GenBank; MF155250; MF155268) [19, 20, 67], somatostatin (GenBank; MF155252;  
257 MF155253) [8], tachykinin (GenBank; MF155254) [8], thyrotropin-releasing hormone  
258 (TRH) (GenBank; MF155255; MF155256) [16] and vasopressin/oxytocin (GenBank;  
259 MF155257) [64, 65] (**Figures 5-7 and S5-S10**). With the exception of MCH (which may be  
260 unique to deuterostomes) [6, 8], AN peptides and SALMFamides (which thus far have only  
261 been identified in echinoderms), the origins of all of the neuropeptide precursors identified  
262 here in ophiuroids predate the divergence of protostomes and deuterostomes [6, 7]. Of the  
263 three species examined here, the neuropeptide precursor complement of *O. victoriae* was the  
264 most complete (**Figure 4**) and therefore this species is used as a representative ophiuroid for  
265 sequence alignments, except in a few cases where a neuropeptide precursor was not found in

266 *O. victoriae*. Below we highlight several interesting and/or unusual features of ophiuroid  
267 neuropeptides and neuropeptide precursors.

268

269 ***Neuropeptide precursors that occur in multiple forms in O. victoriae***

270

271 Thyrotropin-releasing hormone (TRH)-type precursors

272 TRH (also known as thyrotropin-releasing factor or thyroliberin) was first isolated and  
273 sequenced in the 1960s [68-70]. In mammals, TRH is produced in the hypothalamus and  
274 stimulates the release of thyroid-stimulating hormone (TSH) and prolactin from the anterior  
275 pituitary [71, 72]. The recent discovery of a TRH receptor in the annelid *Platynereis*  
276 *dumerilii* indicates that the evolutionary origin of this neuropeptide signaling system predates  
277 the divergence of protostomes and deuterostomes [73].

278 The human TRH precursor contains six copies of the tripeptide pQHPamide [74].  
279 Precursor proteins comprising multiple copies of TRH-like peptides have been identified  
280 previously in the sea urchin *S. purpuratus*, the sea cucumber *A. japonicus* and the starfish *A.*  
281 *rubens* [8, 15, 16], with a single TRH-type precursor found in each of these species.  
282 Interestingly, here we identified two TRH-type precursors (OvTRHP1 and OvTRHP2) in *O.*  
283 *victoriae* (**Figure S2 and 6A**). OvTRHP1 comprises 21 copies of putative TRH-like  
284 tetrapeptides with the motif pQXXXamide (where X is variable). OvTRHP2, on the other  
285 hand, comprises two copies of the putative tetrapeptide pQGPRamide and two longer  
286 peptides that also have a C-terminal GPRamide motif but lack the N-terminal pyroglutamate.

287

288 Cholecystokinin (CCK)-type precursors

289 A CCK-type peptide (formerly pancreozymin) was first sequenced in the 1960s [75].  
290 CCK-type peptides play numerous roles in feeding and digestion related physiology. CCK  
291 mediates satiety, stimulates the release of digestive enzymes and gall bladder contractions  
292 [76-78]. CCK-type peptides are involved in mechanisms of learning and memory, and

293 analgesia [79]. A neuropeptide precursor comprising two CCK-like peptides was recently  
294 identified in the starfish *A. rubens* [8]. Here we have identified two CCK-type precursors in  
295 *O. victoriae* (OvCCKP1 and OvCCKP2) and orthologs of both of these precursors were also  
296 identified in the sea urchin *S. purpuratus* (Figure S2) [16]. The CCK-type precursor 1  
297 comprises three CCK-like peptides in both *O. victoriae* and *S. purpuratus* and this precursor  
298 is similar to the *A. rubens* CCK-type precursor, which comprises two CCK-like peptides. In  
299 contrast, the CCK-type precursor 2 comprises a single CCK-like peptide in both *O. victoriae*  
300 and *S. purpuratus*. Interestingly, the sequence of the *S. purpuratus* CCK-type precursor 2 was  
301 reported previously as part of a genome-wide search for neuropeptides [80], but the authors  
302 of this study did not identify it as a CCK-type precursor. However, based on the presence of a  
303 conserved tyrosine residue and a C-terminal F-amide motif in the predicted neuropeptide  
304 derived from this protein, it is evident that it belongs to the family of CCK-type precursors  
305 (Figure 6B). A search of a preliminary genome assembly of the starfish *Patiria miniata*  
306 (<http://www.echinobase.org>) [81] did not reveal a gene encoding a CCK-type precursor 2.  
307 Therefore, it appears that this neuropeptide precursor type may have been lost in the  
308 Asteroidea; nevertheless, further analysis of a wider range of starfish species will be required  
309 to draw definitive conclusions. With a broader evolutionary perspective, CCK-type peptides  
310 in deuterostomes are orthologs of sulfakinin (SK)-type neuropeptides found in insects [6, 7].  
311 Interestingly, insects have a single SK precursor, which comprises two neuropeptides, SK-1  
312 and SK-2 [82], and this may reflect the ancestral condition in the common ancestor of  
313 protostomes and deuterostomes. Thus, the occurrence of two CCK-type peptides on a single  
314 precursor in *A. rubens* and insects may be an ancestral characteristic and the occurrence of  
315 two CCK-type precursors that comprise one and three CCK-type peptides appears to be a  
316 derived characteristic.

317

318 Somatostatin-type precursors

319 Somatostatin was first isolated and sequenced from sheep hypothalamus in 1973 [83].  
320 This peptide inhibits the release of pituitary hormones such as growth hormone, prolactin and  
321 thyroid-stimulating hormone [84]. Moreover, it also inhibits the release of gastrointestinal  
322 (cholecystokinin and gastrin amongst others) and pancreatic (insulin and glucagon) hormones  
323 [85-87]. Aside from its effects on release of hormones, somatostatin also has central actions  
324 that influence motor activity [85]. Here, we have identified two somatostatin-type precursors  
325 (OvSSP-1 and OvSSP-2) in *O. victoriae*. (**Figure S2 and 6C**). Homologs of both of these  
326 precursors are present in the sea urchin *S. purpuratus* (**Figure S2 and 6C**), one of which was  
327 previously referred to as Spnp16 [16]. By comparison, only a single somatostatin-type  
328 precursor has been found in the starfish *A. rubens*, which is an ortholog of OvSSP-1 [8]. All  
329 somatostatin-type precursors comprise a single copy of the bioactive neuropeptide, which is  
330 located in the C-terminal region of the precursor [88, 89]. Interestingly, the type-1  
331 somatostatins in echinoderms have a phenylalanine residue located in the middle part of the  
332 peptide and this conserved feature is found in human somatostatin. Conversely, type-2  
333 somatostatins in echinoderms lack the phenylalanine residue but have a neighbouring  
334 tryptophan-lysine (WK) motif that is also conserved in human and *B. floridae* somatostatins  
335 (**Figure 6C**). The deuterostomian somatostatins are orthologous to the allatostatin-C  
336 neuropeptide family in arthropods [7]. This family of peptides comprises three precursor-  
337 types: allatostatin-C, allatostatin-CC and the recently discovered allatostatin-CCC [89, 90].  
338 Both allatostatin-C and allatostatin-CC are non-amidated, like somatostatins; however,  
339 allatostatin-CCC has a C-terminal amide. Hence, non-amidated peptides may be  
340 representative of the ancestral condition in the common ancestor of protostomes and  
341 deuterostomes, with the amidated allatostatin-CCC probably having evolved only within the  
342 arthropod lineage [90]. It remains to be determined whether or not the duplication of  
343 somatostatin-type precursors in echinoderms and the duplication of allatostatin C (to give rise  
344 to allatostatin-CC) represent independent duplications. Further insights into this issue may be  
345 obtained if the receptors for somatostatin-type peptides in echinoderms are deorphanised.

346

347 Corticotropin-releasing hormone (CRH)-type precursors

348 CRH-type peptides are a family of related neuropeptides that include CRH, urocortins  
349 and urotensin-I in chordates, egg-laying hormone (ELH) in lophotrochozoans and diuretic  
350 hormone 44 (DH<sub>44</sub>) in arthropods [6, 7]. Arthropods usually have a single DH<sub>44</sub> precursor,  
351 which comprises a single copy of the mature peptide. In some insects, such as *Tribolium*  
352 *castaneum* and *Bombyx mori*, alternative splicing of DH<sub>44</sub> transcripts results in multiple  
353 mature peptide isoforms of varying lengths [43, 91]. The situation in lophotrochozoans is  
354 more complex, with several species having multiple precursors and some of these precursors  
355 comprising multiple ELH mature peptides [4, 92]. A single CRH-type precursor was found  
356 previously in the starfish *A. rubens*, whereas here we have identified four CRH-type  
357 precursors in *O. victoriae* (**Figure S2 and 6D**). Thus, expanded families of CRH-type  
358 peptides and receptors appear to have evolved independently in multiple animal lineages,  
359 including chordates and ophiuroid echinoderms [93, 94].

360

361 *Diversity in neuropeptide precursor structure: new insights from ophiuroids*

362

363 Tachykinins

364 The mammalian neuropeptide substance P was the first tachykinin-type peptide to be  
365 isolated and sequenced [95-97]. Subsequently, tachykinin-type peptides were discovered in  
366 other animals including tunicates [98], insects [99, 100], annelids [101] and molluscs [102].  
367 Tachykinin-type peptides regulate various physiological processes including muscle  
368 contractility [103], nociception [104] and stress responses [105] amongst others [106].  
369 Analysis of genomic/transcriptomic sequence data from the sea urchin *S. purpuratus* and the  
370 sea cucumber *A. japonicus* did not identify candidate tachykinin-type precursors [6, 7, 15,  
371 16]. However, recently a putative tachykinin-type precursor was discovered in the starfish *A.*  
372 *rubens* (ArTKP), indicating that this signaling system does occur in some echinoderms [8].

373 Here we have identified orthologs of ArTKP in *O. victoriae* and other ophiuroids (**Figure 4**  
374 **and 7A**). Collectively, these findings indicate that this signaling system has been retained in  
375 the Asterozoa but lost in the Echinozoa. Comparison of the structure of the asterozoan  
376 tachykinin-type precursors reveals that the *A. rubens* precursor (ArTKP) comprises two  
377 putative mature peptides, whereas the *O. victoriae* precursor comprises four mature peptides  
378 (**Figure 7B**). It remains to be determined, however, which of these two conditions represents  
379 the ancestral state in the common ancestor of the Asterozoa. Further insights into this issue  
380 may be obtained if sequence data from a variety of starfish species are analysed.

381

### 382 Kisspeptins (KP)

383 Kisspeptin (formerly known as metastin) is encoded by the *KiSS1* gene in humans.  
384 *KiSS1* was originally discovered as a gene that may suppress the metastatic potential of  
385 malignant melanoma cells [107]. Subsequently, it was found to play a vital role in regulating  
386 the onset of puberty. Thus, in vertebrates kisspeptin binds to its receptor GPR54 to stimulate  
387 pituitary release of gonadotropin-releasing hormone (GnRH) [108]. The first KP-type  
388 precursors to be identified in non-chordates were discovered recently in ambulacrarians - the  
389 echinoderms *A. rubens* and *S. purpuratus* and the hemichordate *S. kowalevskii* [8].  
390 Accordingly, here we have identified KP-type precursors in *O. victoriae* and other  
391 ophiuroids. All of the ambulacrarian precursor proteins comprise two KP-type peptides and  
392 the first putative neuropeptide in the echinoderm precursors has two cysteine residues at the  
393 N-terminus, which could form an N-terminal disulphide bridge similar that of calcitonin-type  
394 peptides (see below). In contrast, the second putative neuropeptide does not contain any  
395 cysteine residues and is typically shorter than the first peptide (**Figure 7C and D**).  
396 Interestingly, comparison of the sequences of the first (long) and second (short) KP-type  
397 peptides in echinoderms reveals that the long and short peptides share less sequence  
398 similarity with each other within a species than they do with respective peptides in other  
399 species (**Figure 7C**). This indicates that the duplication event that gave rise to the occurrence



400 of the long and short peptides occurred before the divergence of the Asterozoa and  
401 Echinozoa. Interestingly, previous studies have revealed that there has been an expansion of  
402 KP-type receptors in ambulacraria (*S. purpuratus* and *S. kowalevskii*) and in the  
403 cephalochordate, *Branchiostoma floridae*, with 16 KP receptors present in the latter [6, 56].  
404 Further studies are now needed to identify the proteins that act as receptors for the KP-type  
405 peptides identified here in ophiuroids and previously in other echinoderms [8].

406

#### 407 Calcitonin

408 Calcitonin was first discovered in 1962 by Copp and Cheney [109]. The sequencing of  
409 the porcine calcitonin in 1968 revealed that this polypeptide is composed of 32 amino acids  
410 [110]. In vertebrates, calcitonin is produced by the thyroid gland [111] and regulates calcium  
411 ( $\text{Ca}^{2+}$ ) levels in the blood, antagonizing the effects of parathyroid hormone [112, 113]. The  
412 evolutionary antiquity of calcitonin-related peptides was first revealed with the discovery that  
413 a diuretic hormone in insects ( $\text{DH}_{31}$ ) is a calcitonin-like peptide [114]. However,  $\text{DH}_{31}$  shares  
414 modest sequence similarity with vertebrate calcitonins and lacks the N-terminal disulphide  
415 bridge that is characteristic of calcitonin-type peptides in vertebrates. More recently, it has  
416 been discovered that both  $\text{DH}_{31}$ -type and vertebrate calcitonin-type neuropeptides occur in  
417 some protostomian invertebrates, including the annelid *Platynereis dumerilii* and the insect  
418 *Locusta migratoria* [4, 115]. Hence, it is proposed that an ancestral-type calcitonin precursor  
419 gene duplicated in the common ancestor of protostomes to give rise to  $\text{DH}_{31}$ -type and  
420 calcitonin-type peptides, but with subsequent loss of calcitonin-type peptides in some  
421 protostomes. Consistent with this hypothesis, calcitonin-type precursors but not  $\text{DH}_{31}$ -type  
422 precursors have been identified in deuterostomian invertebrates, including echinoderms [8,  
423 15, 16, 116].

424 An interesting feature of calcitonin/ $\text{DH}_{31}$  precursors is the occurrence of multiple  
425 splice variants. In vertebrates, alternative splicing of the calcitonin gene results in two  
426 transcripts: one transcript encodes calcitonin and the other transcript encodes calcitonin gene-

427 related peptide [117]. Furthermore, a complex interplay of receptors and accessory proteins  
428 determines the pharmacological profile of these peptides [118, 119]. Alternative splicing of  
429 DH<sub>31</sub> and calcitonin precursors in insects has also been previously reported [115, 120, 121].  
430 Interestingly, alternative splicing of insect calcitonin genes also generates variants that give  
431 rise to different mature peptides [115]. However, unlike the calcitonin gene, DH<sub>31</sub> splice  
432 variants all produce an identical mature peptide [120, 121].

433 Our analysis of the ophiuroid transcriptomes also identified two transcript variants for  
434 calcitonin (**Figure 7E and F**). Based on our analysis of transcript sequences, ophiuroid  
435 calcitonin genes comprise at least three putative coding regions or ‘exons’. It is unclear if  
436 these three coding regions represent three or more exons due to the lack of genomic data, but  
437 for the sake of simplicity, we refer to them here as ‘exons’. Transcript variant 1 comprises  
438 ‘exons’ 1 and 3 but lacks ‘exon’ 2 whereas transcript variant 2 contains all 3 ‘exons’.  
439 Interestingly, ‘exons’ 2 and 3 both encode a calcitonin-type peptide. Hence, transcript variant  
440 1 encodes a precursor that produces one calcitonin-type peptide and transcript variant 2  
441 encodes two non-identical calcitonin-type peptides. These alternatively spliced transcripts  
442 were found in several brittle star species (**Figure 8**) and thus this may represent an ancient  
443 and conserved feature, although transcript variant 1 was not found in *O. victoriae*.

444 Previous studies have identified precursors comprising a single calcitonin-type  
445 peptide in the starfish *A. rubens* and the sea urchin *S. purpuratus* [8, 16], and a precursor  
446 comprising two calcitonin-type peptides in the sea cucumber *A. japonicus* [15]. Informed by  
447 the identification here of two transcript types in ophiuroids (transcript variant 1 and 2), we  
448 have now discovered that two transcript types also occur in *A. japonicus* transcriptome.  
449 Hence, alternative splicing of calcitonin-type precursor genes can be traced back in the  
450 echinoderm lineage to the common ancestor of the Asterozoa and Echinozoa, but with  
451 subsequent loss of this characteristic in some lineages.

452

453 GPA2 and GPB5

454 The vertebrate glycoprotein hormone family comprises luteinizing hormone (LH)  
455 follicle-stimulating hormone (FSH), chorionic gonadotropin (CG), thyroid-stimulating  
456 hormone (TSH) and the recently discovered thyrostimulin (TS) [122, 123]. Thyrostimulin is a  
457 heterodimer composed of two subunits, glycoprotein alpha 2 (GPA2) and glycoprotein beta 5  
458 (GPB5). Orthologs of GPA2 and GPB5 have been identified and characterized in the insect  
459 *Drosophila melanogaster* [124] and in other invertebrates, including echinoderms [125].  
460 Insect GPA2 and GPB5 both contain 10 conserved cysteine residues that are important in  
461 forming a heterodimeric cysteine-knot structure. Surprisingly, *A. japonicus* GPA2 contains  
462 only 7 cysteine residues (having lost residues 7, 8 and 9) while *O. victoriae* GPB5.1, *A.*  
463 *rubens* GPB5.1 and *S. purpuratus* GPB5 all contain 8 cysteine residues (having lost the final  
464 two cysteine residues) (**Figure S5**). It is difficult to predict the structural differences that may  
465 arise in the heterodimer due to this variability in the number of cysteine residues. The  
466 possibility of GPA2 and/or GPB5 monomers or homodimers exerting their own biological  
467 functions has not been ruled out [126]. Additional investigations are needed to investigate if  
468 GPA2 and GPB5 are co-localized in echinoderms and if the monomers and dimers (both  
469 homo and hetero) exert different effects.

470

#### 471 *Uncharacterized neuropeptides*

472 In addition to the neuropeptides discussed above, we have also identified three  
473 neuropeptide precursors that could not be classified into any known neuropeptide families.  
474 These include *O. victoriae* neuropeptide precursor (Ovnp) 18 (*O. victoriae* ortholog of  
475 Spnp18 in *S. purpuratus*) [16], Ovnp26 and Ovnp27, with the latter two identified for the first  
476 time in echinoderms. The choice of nomenclature for Ovnp26 and Ovnp27 is based on a  
477 previously used numerical nomenclature in *S. purpuratus* and/or *A. rubens*, which goes up to  
478 Arnp25 in *A. rubens*.

479

480 Ovnp18

481 Ovnp18 comprises four copies of a predicted mature peptide with the sequence  
482 LFWVD and the C-terminal region of the precursor (partial sequence) contains at least four  
483 cysteine residues (**Figure 5F**, GenBank; MF155258). Interestingly, this precursor type only  
484 comprises a single mature peptide in *A. rubens*, *S. purpuratus* and *A. japonicus* and the C-  
485 terminal region contains 9, 8 and 8 cysteine residues, respectively (data not shown) [[8](#), [15](#),  
486 [16](#)].

487

#### 488 Ovnp26

489 Ovnp26 was identified following an analysis of *O. victoriae* transcriptome sequence  
490 using NpSearch [[8](#)]. Orthologs of Ovnp26 (GenBank; MF155259) were identified in other  
491 brittle stars but not in other echinoderms (**Figure S2-S4**). Ovnp26 comprises seven copies of  
492 peptides with a conserved C-terminal GW motif, whereas orthologs in *O. aranea* and *A.*  
493 *filiformis* are predicted to generate eight copies of the mature peptide. Some of the mature  
494 peptides have a C-terminal SGW motif, which is similar to the C-terminus of predicted  
495 mature peptides derived from *O. victoriae* pedal peptide precursor 3 (**Figure S7**). However,  
496 the lack of sequence similarity in other parts of the peptide suggests that the C-terminal  
497 similarity may reflect convergence rather than homology.

498

#### 499 Ovnp27

500 Ovnp27 (GenBank; MF155251) was identified following a HMM-based search for  
501 SIFamide-type peptides [[127](#), [128](#)], albeit with a high E-value. This neuropeptide precursor  
502 comprises two putative amidated mature peptides that are located immediately after the signal  
503 peptide (**Figure S2-S4**), as seen in SIFamide precursors [[129](#)]. The first peptide of the *O.*  
504 *victoriae* precursor has a C-terminal IFamide motif just like in insect SIFamides (**Figure S9**).  
505 However, there is no sequence similarity with SIFamides in the rest of the peptide. This  
506 coupled with the fact that SIFamide-type receptors have not been identified in echinoderms

507 [6] suggests that the sequence similarity that peptides derived from Ovnp27-type precursors  
508 share with SIFamides may reflect convergence rather than homology.

509

### 510 *Neuropeptide precursors not found in brittle stars*

511 Our analysis of ophiuroid transcriptome sequence data did not reveal orthologs of the  
512 Spnp9 precursor from *S. purpuratus* or the Arnp21, Arnp22, Arnp23 and Arnp24 precursors  
513 from *A. rubens* [8, 16]. An Spnp9 ortholog is found in *A. japonicus* but not in *A. rubens* [15]  
514 and therefore this neuropeptide precursor type may be restricted to the Echinozoa. Orthologs  
515 of Arnp21-24 have not been found in *O. victoriae*, *S. purpuratus* or *A. japonicus*, which  
516 suggests that these may be Asteroidea-specific precursors.

517 Previous studies have shown that receptors for leucokinin, ecdysis-triggering  
518 hormone, QRFP, parathyroid hormone, galanin/allatostatins-A and Neuromedin-U/CAPA are  
519 present in ambulacraria [6, 7, 15]. The presence of these receptors suggests that their cognate  
520 ligands should also be present in ambulacraria. However, our search approaches failed to  
521 identify any proteins in ophiuroids that resemble precursors of these neuropeptides.

522

### 523 *Evolutionary conservation and variation of neuropeptide copy number in the Ophiuroidea*

524 Many neuropeptide precursors comprise several structurally similar but non-identical  
525 bioactive peptides – i.e. the precursor protein gives rise to a neuropeptide “cocktail”. This  
526 feature of neuropeptide precursors occurs throughout metazoans. But how do these  
527 “cocktails” of neuropeptides evolve and what is their functional significance? Are the copies  
528 of mature peptides functionally redundant or do they have their own specific functions?  
529 These are important questions in neuroendocrinology for which answers remain elusive.

530 Evidence that neuropeptide copy number may be functionally important has been  
531 obtained from comparison of the sequences of neuropeptide precursors in twelve *Drosophila*  
532 species, the common ancestor of which dates back ~50 million years [130]. The number of  
533 peptide copies in each neuropeptide precursor was found to be identical (except for the

534 FMRFamide precursor) when compared between the twelve species, suggesting that  
535 stabilising selection has acted to conserve neuropeptide “cocktails” in the *Drosophila* lineage.

536 Here, a comparison of *O. victoriae*, *A. filiformis* and *O. aranea* neuropeptide  
537 precursors and their putative mature peptides revealed that fourteen neuropeptide precursors  
538 comprised multiple neuropeptide copies. In certain cases, the number of the mature peptides  
539 derived from a particular precursor varied across species, whereas in other cases the numbers  
540 remained constant (**Figure 4**). Interestingly, these three species belong to two of the three  
541 major clades of brittle stars that evolved ~270 million years ago [12]. While *O. victoriae*  
542 belongs to the Chilophiurina infraorder (clade A), *A. filiformis* and *O. aranea* belong to the  
543 Gnathophiurina infraorder (clade C). Hence, this prompted us to examine the evolution of  
544 neuropeptides and neuropeptide copy number variation at a higher level of phylogenetic  
545 resolution. To do this, we utilized a unique dataset comprising 52 ophiuroid transcriptomes.  
546 These transcriptomes were recently used as part of a phylotranscriptomic approach to  
547 reconstruct the phylogeny of ophiuroids, generating a robust phylogenetic tree that comprises  
548 three major clades [12]. Hence, this dataset allowed us to explore the evolution of  
549 neuropeptide precursors in the context of an established phylogenetic framework spanning  
550 over an unprecedented timescale of ~270 million years.

551 We selected for analysis neuropeptide precursors comprising more than a one putative  
552 mature neuropeptide, which include AN peptide, calcitonin, cholecystokinin 1, kisspeptin,  
553 np18, np26, np27, NG peptide, PDF, SALMFamide (L-type and F-type), tachykinin and TRH  
554 (1 and 2). Pedal peptide precursors (1, 2 and 3) were excluded from the analysis because  
555 orthology relationships between these precursors could not be established with confidence  
556 across all species (data not shown). We used *O. victoriae* representatives of these  
557 neuropeptide precursor families and the *A. filiformis* AN peptide precursor to mine 52  
558 ophiuroid transcriptomes using BLAST. Multiple sequence alignments were generated based  
559 on the search hits (**Figure S11**) and the number of predicted mature peptides were compared  
560 (**Figure 8**). Interestingly, the number of peptides within the majority of precursors remained

561 constant across all the species examined, which share a common ancestor estimated to date  
562 from ~270 million years ago [12].

563 Some studies that have investigated the physiological significance of neuropeptide  
564 “cocktails” indicate that neuropeptides derived from the same precursor protein are  
565 functionally redundant. For example, this was found for myomodulin neuropeptides in the  
566 mollusk *Aplysia californica* using the accessory radula closer muscle preparation as a  
567 bioassay [131] and for FMRFamide-related neuropeptides in *Drosophila melanogaster* when  
568 analysing effects on nerve-stimulated contraction of larval body-wall muscles [132].  
569 However, the authors of the latter study cautiously highlighted the need to “search for  
570 additional functions or processes in which these peptides may act differentially”. Importantly,  
571 studies employing use of multiple bioassays have obtained data indicating that neuropeptides  
572 derived from a single precursor protein are not functionally redundant. For example, when  
573 the actions of fourteen structurally related neuropeptides derived from a precursor of *Mytilus*  
574 Inhibitory Peptide-related peptides in *Aplysia* were tested on three organ preparations  
575 (oesophagus, penis retractor, body wall) it was found that the rank order of potency for the  
576 peptides differed between preparations [133]. Similarly, when assaying the effects of  
577 allatostatin neuropeptides in cockroaches, tissue-specific differences in potency were  
578 observed [134]. The conservation of peptide copy number across a timescale of ~270 million  
579 years in the Ophiuroidea supports the idea that the occurrence of multiple copies of identical  
580 or structurally related neuropeptides is functionally important.

581 For those neuropeptide precursors that did exhibit variation in neuropeptide copy  
582 number, TRH-type precursors exhibited the highest variation, with numbers ranging from 16  
583 to 20 copies (**Figure 9**). F-type SALMFamide precursors also showed variation in copy  
584 numbers (**Figure 10**) but loss of peptides was more frequent in F-type SALMFamide  
585 precursors than in TRH-type precursors. Furthermore, detailed analysis of sequence  
586 alignments for these precursors revealed that loss of neuropeptide copies is usually a  
587 consequence of non-synonymous mutations in codons for residues that form dibasic cleavage

588 sites or for glycine residues that are substrates for the C-terminal amidation. This is not  
589 surprising since the C-terminal amide in smaller-sized peptides is usually important for  
590 receptor binding and activation. What is unclear at the moment is how the peptide copy  
591 number increases within a given precursor. Perhaps the increase in peptide copy number  
592 occurs as a result of unequal crossing-over during recombination [130].

593 The number of peptides within the F-type SALMFamide precursors appear to be clade  
594 specific. Thus, the average/median number of F-type SALMFamides in precursors from clade  
595 A is 13, clade B is 12 and clade C is 11, with a few exceptions (**Figure 8**). Similarly, the  
596 number of peptides within NP26-type precursors also appears to be clade specific. Hence the  
597 number of peptides is highly stable at 7 peptides within clades A and B but a high variation in  
598 peptide copy number is observed in clade C. When examining peptide copy number within  
599 clades, there are a few cases where the number of peptides within a given precursor for  
600 certain species appears to be an exception/outlier. For instance, 16 copies of the mature  
601 peptide in *Ophioplax lamellosa* TRH-1 precursor is distinctly different to the 19 copies found  
602 in other species within that clade (clade C). Likewise, *Ophiactis savignyi* only has 3 copies of  
603 kisspeptin-type peptides compared to 4 copies found in other species of that clade (**Figure 8**).

604 It could be argued that misalignments during transcriptome assembly may have  
605 influenced the number of predicted peptides found in a given precursor. However, it is  
606 unlikely that misalignments have affected the predicted sequences of neuropeptide precursors  
607 comprising multiple copies of peptides that are similar but non-identical, which applies to the  
608 majority of the precursor proteins analysed here in ophiuroids. The only exception to this are  
609 the TRH-type precursors, where the encoded peptide sequences are short and often identical,  
610 even at the nucleotide level (data not shown), Another limitation of using transcriptome data  
611 is that the sequences of neuropeptide precursors may be partial or unknown for some species  
612 and where this applies a peptide copy number is not shown in Fig. 8. An extreme example of  
613 this is the AN peptide precursor, where complete precursors sequences were only obtained  
614 from the three reference species and three other species. However, for the majority of



615 precursor types, sequence data was obtained from a variety of species from each of the three  
616 clades of ophiuroids. For example, complete F-type SALMFamide precursor sequences were  
617 found in most of the investigated species (39 species + 3 reference species).

618

## 619 **Conclusion**

620 Here we report the first detailed analysis of the neuropeptide precursor complement of  
621 ophiuroids and the most comprehensive identification of echinoderm neuropeptide precursors  
622 to date. We have identified novel representatives of several bilaterian neuropeptide families  
623 in echinoderms for the first time, which include orthologs of endothelin/CCHamide, eclosion  
624 hormone, neuropeptide-F/Y and nucleobinin/nesfatin. Furthermore, analysis of precursor  
625 proteins comprising multiple copies of identical or related neuropeptides across ~270 million  
626 years of ophiuroid evolution indicates that the precise composition of neuropeptide  
627 “cocktails” is functionally important as evident from the conservation of neuropeptide copy  
628 number for multiple precursors.

629

## 630 **Methods**

### 631 ***Sequencing and assembly of transcriptomes***

632 Ophiuroid transcriptomes used in this study were sequenced and assembled as  
633 reported previously [[12](#), [20](#), [24](#)].

634

### 635 ***Identification of neuropeptide precursors in ophiuroids***

636 In order to identify neuropeptide precursors in *O. victoriae*, *A. filiformis* and *O.*  
637 *aranea*, sequences of neuropeptide precursors identified previously in other echinoderms  
638 (including the starfish, *A. rubens*, the sea urchin *S. purpuratus* and the sea cucumber, *A.*  
639 *japonicus*) were used as queries for tBLASTn analysis of a transcriptome database, using an e  
640 value of 1000. Sequences identified as potential neuropeptide precursors by BLAST were  
641 translated using the ExpASY Translate tool (<http://web.expasy.org/translate/>) and then

642 analysed for features of neuropeptide precursors. Specifically, sequences were evaluated  
643 based on 1) the presence of an N-terminal signal peptide (using Signal P v 4.1 with the  
644 sensitive cut-off of 0.34) and 2) the presence of monobasic or dibasic cleavage sites flanking  
645 the putative bioactive peptide(s).

646 To identify novel neuropeptide precursors or highly-divergent precursors with low  
647 sequence similarity to known precursors, we utilized two additional approaches. In the first  
648 approach, we used NpSearch [8], software that identifies putative neuropeptide precursors  
649 based on various characteristics (presence of signal peptide and dibasic cleavage sites  
650 amongst others). In the second approach, NpHMMer (<http://nphmmmer.sbcs.qmul.ac.uk/>), a  
651 Hidden Markov Models (HMM) based software was used to identify neuropeptides not found  
652 using the above approaches.

653 Neuropeptide precursors identified in *O. victoriae* (which represented a more  
654 comprehensive neuropeptide precursor repertoire compared to *A. filiformis* and *O. aranea*)  
655 were then submitted as queries for BLAST analysis of sequence data from 52 Ophiuroidea  
656 species, using an E-value of 1e-06. BLAST hits were then further analysed using an  
657 automated ruby script (available at [https://github.com/IsmailM/ophiuroid\\_neuropeptidome](https://github.com/IsmailM/ophiuroid_neuropeptidome)).  
658 Each BLAST hit was translated using BioRuby and the open reading frame (ORF) containing  
659 the BLAST high-scoring segment pair was extracted. These ORFs were then examined for  
660 the presence of a signal peptide using Signal P 4.1 using a sensitive cut-off of 0.34. All  
661 sequences were then aligned using MAFFT, with the number of maximum iterations set to  
662 1000 to ensure an optimal alignment. These alignments were then further optimized by  
663 manually adjusting the location of the bioactive peptide and cleavage sites. Finally, the  
664 alignments were annotated using different colours for the signal peptide (blue), the bioactive  
665 peptide(s) (red) and cleavage sites (green).

666

667 ***Phylogenetic and clustering analyses of sequence data***

668 Phylogenetic analysis of membrane guanylyl cyclase receptors and nucleobindins was  
669 performed using maximum likelihood and Bayesian methods. Prior to these analyses,  
670 corresponding multiple alignments were trimmed using BMGE [135] with the following  
671 options: BLOSUM30, max  $-h = 1$ ,  $-b = 1$ , as described previously [10, 94]. The maximum  
672 likelihood method was implemented in the PhyML program (v3.1/3.0 aLRT). The WAG  
673 substitution model was selected assuming an estimated proportion of invariant sites (of  
674 0.112) and 4 gamma-distributed rate categories to account for rate heterogeneity across sites.  
675 The gamma shape parameter was estimated directly from the data. Reliability for internal  
676 branch was assessed using the bootstrapping method (500 bootstrap replicates). The Bayesian  
677 inference method was implemented in the MrBayes program (v3.2.3). The number of  
678 substitution types was fixed to 6. The poisson model was used for substitution, while rates  
679 variation across sites was fixed to "invgamma". Four Markov Chain Monte Carlo (MCMC)  
680 chains were run for 100000 generations, sampling every 100 generations, with the first 500  
681 sampled trees discarded as "burn-in". Finally, a 50% majority rule consensus tree was  
682 constructed.

683 CLANS analysis was performed on echinoderm EH-like, arthropod EH, arthropod  
684 ITP and vertebrates ANP precursors based on all-against-all sequence similarity (BLAST  
685 searches) using BLOSUM 45 matrix (<https://toolkit.tuebingen.mpg.de/clans/>) [41] and the  
686 significant high-scoring segment pairs (HSPs). Neuropeptide precursors were clustered in a  
687 three-dimensional graph represented here in two dimensions.

688

### 689 **Data accessibility**

690 Raw sequence data used to assemble the transcriptomes have been deposited in the NCBI  
691 Sequence Read Archive (SRA) under the accession number SRP107914  
692 (<https://www.ncbi.nlm.nih.gov/sra/?term=SRP107914>) and in the NCBI BioProject under the  
693 accession number PRJNA311384 (<https://www.ncbi.nlm.nih.gov/bioproject/311384>).

694

695 **Competing interests**

696 The authors declare that no competing interests exist.

697

698 **Author contributions**

699 M.Z., T.D.O. and M.R.E.: designed the research; I.M.: generated HMM models; M.Z., I.M.,

700 L.A.Y.G., J.D., N.A. and A.F.H: identified the neuropeptide precursors; M.Z., I.M.,

701 L.A.Y.G., J.D. and N.A.: analysed the data; M.Z., J.D. and M.R.E. wrote the manuscript with

702 input from other authors. M.Z. and M.R.E: supervised the study.

703

704 **Acknowledgements**

705 The authors would like to acknowledge Zuraiha Waffa and Giulia Oluwabunmi Olayemi for

706 their assistance with sequence alignments.

707

708 **Funding statement**

709 This work was supported by Leverhulme Trust grant (RPG-2013-351) and a BBSRC grant

710 (BB/M001644/1) awarded to M.R.E. L.A.Y.G is supported by a PhD studentship awarded by

711 CONACYT (studentship number 418612).

712 **References**

713

714 1 Nassel, D. R., Winther, A. M. 2010 *Drosophila* neuropeptides in regulation of physiology  
715 and behavior. *Prog Neurobiol.* **92**, 42-104. (10.1016/j.pneurobio.2010.04.010)

716 2 Argiolas, A., Melis, M. R. 2013 Neuropeptides and central control of sexual behaviour  
717 from the past to the present: a review. *Prog Neurobiol.* **108**, 80-107.  
718 (10.1016/j.pneurobio.2013.06.006)

719 3 Sohn, J. W., Elmquist, J. K., Williams, K. W. 2013 Neuronal circuits that regulate feeding  
720 behavior and metabolism. *Trends Neurosci.* **36**, 504-512. (10.1016/j.tins.2013.05.003)

721 4 Conzelmann, M., Williams, E. A., Krug, K., Franz-Wachtel, M., Macek, B., Jekely, G.  
722 2013 The neuropeptide complement of the marine annelid *Platynereis dumerilii*. *BMC*  
723 *Genomics.* **14**, 906. (10.1186/1471-2164-14-906)

724 5 Veenstra, J. A. 2016 Neuropeptide Evolution: Chelicerate Neurohormone and Neuropeptide  
725 Genes may reflect one or more whole genome duplications. *Gen Comp Endocrinol.*  
726 (10.1016/j.ygcen.2015.07.014)

727 6 Mirabeau, O., Joly, J. S. 2013 Molecular evolution of peptidergic signaling systems in  
728 bilaterians. *Proc Natl Acad Sci U S A.* **110**, E2028-2037. (10.1073/pnas.1219956110)

729 7 Jekely, G. 2013 Global view of the evolution and diversity of metazoan neuropeptide  
730 signaling. *Proc Natl Acad Sci U S A.* **110**, 8702-8707. (10.1073/pnas.1221833110)

731 8 Semmens, D. C., Mirabeau, O., Moghul, I., Pancholi, M. R., Wurm, Y., Elphick, M. R.  
732 2016 Transcriptomic identification of starfish neuropeptide precursors yields new insights  
733 into neuropeptide evolution. *Open Biol.* **6**, 150224. (10.1098/rsob.150224)

734 9 Semmens, D. C., Beets, I., Rowe, M. L., Blowes, L. M., Oliveri, P., Elphick, M. R. 2015  
735 Discovery of sea urchin NGFFFamide receptor unites a bilaterian neuropeptide family. *Open*  
736 *Biol.* **5**, 150030. (10.1098/rsob.150030)

737 10 Tian, S., Zandawala, M., Beets, I., Baytemur, E., Slade, S. E., Scrivens, J. H., Elphick, M.  
738 R. 2016 Urbilaterian origin of paralogous GnRH and corazonin neuropeptide signalling  
739 pathways. *Sci Rep.* **6**, 28788. (10.1038/srep28788)

740 11 Telford, M. J., Lowe, C. J., Cameron, C. B., Ortega-Martinez, O., Aronowicz, J., Oliveri,  
741 P., Copley, R. R. 2014 Phylogenomic analysis of echinoderm class relationships supports  
742 Asterozoa. *Proc Biol Sci.* **281**, (10.1098/rspb.2014.0479)

743 12 O'Hara, T. D., Hugall, A. F., Thuy, B., Moussalli, A. 2014 Phylogenomic resolution of the  
744 class Ophiuroidea unlocks a global microfossil record. *Current Biology.* **24**, 1874-1879.

745 13 Hyman, L. H. 1955 The invertebrates. Vol. 4. Echinodermata, 763 pp. *MacGraw-Hill:*  
746 *New York.*

747 14 Wilkie, I. 2001 Autotomy as a prelude to regeneration in echinoderms. *Microscopy*  
748 *research and technique.* **55**, 369-396.

- 749 15 Rowe, M. L., Achhala, S., Elphick, M. R. 2014 Neuropeptides and polypeptide hormones  
750 in echinoderms: new insights from analysis of the transcriptome of the sea cucumber  
751 *Apostichopus japonicus*. *Gen Comp Endocrinol.* **197**, 43-55. (10.1016/j.ygcen.2013.12.002)
- 752 16 Rowe, M. L., Elphick, M. R. 2012 The neuropeptide transcriptome of a model  
753 echinoderm, the sea urchin *Strongylocentrotus purpuratus*. *Gen Comp Endocrinol.* **179**, 331-  
754 344. (10.1016/j.ygcen.2012.09.009)
- 755 17 Mayorova, T. D., Tian, S., Cai, W., Semmens, D. C., Odekunle, E. A., Zandawala, M.,  
756 Badi, Y., Rowe, M. L., Egertova, M., Elphick, M. R. 2016 Localization of Neuropeptide  
757 Gene Expression in Larvae of an Echinoderm, the Starfish *Asterias rubens*. *Front Neurosci.*  
758 **10**, 553. (10.3389/fnins.2016.00553)
- 759 18 Kim, C. H., Kim, E. J., Go, H. J., Oh, H. Y., Lin, M., Elphick, M. R., Park, N. G. 2016  
760 Identification of a novel starfish neuropeptide that acts as a muscle relaxant. *J Neurochem.*  
761 **137**, 33-45. (10.1111/jnc.13543)
- 762 19 Jones, C. E., Zandawala, M., Semmens, D. C., Anderson, S., Hanson, G. R., Janies, D. A.,  
763 Elphick, M. R. 2016 Identification of a neuropeptide precursor protein that gives rise to a  
764 "cocktail" of peptides that bind Cu(II) and generate metal-linked dimers. *Biochim Biophys*  
765 *Acta.* **1860**, 57-66. (10.1016/j.bbagen.2015.10.008)
- 766 20 Elphick, M. R., Semmens, D. C., Blowes, L. M., Levine, J., Lowe, C. J., Arnone, M. I.,  
767 Clark, M. S. 2015 Reconstructing SALMFamide Neuropeptide Precursor Evolution in the  
768 Phylum Echinodermata: Ophiuroid and Crinoid Sequence Data Provide New Insights. *Front*  
769 *Endocrinol (Lausanne).* **6**, 2. (10.3389/fendo.2015.00002)
- 770 21 Lin, M., Mita, M., Egertova, M., Zampronio, C. G., Jones, A. M., Elphick, M. R. 2016  
771 Cellular localization of relaxin-like gonad-stimulating peptide expression in *Asterias rubens*:  
772 New insights into neurohormonal control of spawning in starfish. *J Comp Neurol.*  
773 (10.1002/cne.24141)
- 774 22 Stöhr, S., O'Hara, T. D., Thuy, B. 2012 Global diversity of brittle stars (Echinodermata:  
775 Ophiuroidea). *PLoS One.* **7**, e31940.
- 776 23 Shackleton, J. D. 2005 Skeletal homologies, phylogeny and classification of the earliest  
777 asterozoan echinoderms. *Journal of Systematic Palaeontology.* **3**, 29-114.
- 778 24 Delroisse, J., Mallefet, J., Flammang, P. 2016 De Novo Adult Transcriptomes of Two  
779 European Brittle Stars: Spotlight on Opsin-Based Photoreception. *PLoS One.* **11**, e0152988.  
780 (10.1371/journal.pone.0152988)
- 781 25 Delroisse, J., Ortega-Martinez, O., Dupont, S., Mallefet, J., Flammang, P. 2015 De novo  
782 transcriptome of the European brittle star *Amphiura filiformis* pluteus larvae. *Marine*  
783 *genomics.* **23**, 109-121.
- 784 26 Burns, G., Thorndyke, M. C., Peck, L. S., Clark, M. S. 2013 Transcriptome  
785 pyrosequencing of the Antarctic brittle star *Ophionotus victoriae*. *Mar Genomics.* **9**, 9-15.  
786 (10.1016/j.margen.2012.05.003)
- 787 27 Cannon, J. T., Kocot, K. M., Waits, D. S., Weese, D. A., Swalla, B. J., Santos, S. R.,  
788 Halanych, K. M. 2014 Phylogenomic resolution of the hemichordate and echinoderm clade.  
789 *Curr Biol.* **24**, 2827-2832. (10.1016/j.cub.2014.10.016)

- 790 28 Vaughn, R., Garnhart, N., Garey, J. R., Thomas, W. K., Livingston, B. T. 2012  
791 Sequencing and analysis of the gastrula transcriptome of the brittle star *Ophiocoma wendtii*.  
792 *Evodevo*. **3**, 19. (10.1186/2041-9139-3-19)
- 793 29 Purushothaman, S., Saxena, S., Meghah, V., Swamy, C. V., Ortega-Martinez, O., Dupont,  
794 S., Idris, M. 2015 Transcriptomic and proteomic analyses of *Amphiura filiformis* arm tissue-  
795 undergoing regeneration. *J Proteomics*. **112**, 113-124. (10.1016/j.jprot.2014.08.011)
- 796 30 Smith, A. B., Paterson, G. L., Lafay, B. 1995 Ophiuroid phylogeny and higher taxonomy:  
797 morphological, molecular and palaeontological perspectives. *Zoological Journal of the*  
798 *Linnean Society*. **114**, 213-243.
- 799 31 Thuy, B., Stohr, S. 2016 A New Morphological Phylogeny of the Ophiuroidea  
800 (Echinodermata) Accords with Molecular Evidence and Renders Microfossils Accessible for  
801 Cladistics. *PLoS One*. **11**, e0156140. (10.1371/journal.pone.0156140)
- 802 32 O'Hara, T. D., Hugall, A. F., Thuy, B., Stohr, S., Martynov, A. V. 2017 Restructuring  
803 higher taxonomy using broad-scale phylogenomics: The living Ophiuroidea. *Mol Phylogenet*  
804 *Evol*. **107**, 415-430. (10.1016/j.ympev.2016.12.006)
- 805 33 Truman, J. W., Riddiford, L. M. 1970 Neuroendocrine control of ecdysis in silkmoths.  
806 *Science*. **167**, 1624-1626. (10.1126/science.167.3925.1624)
- 807 34 Kataoka, H., Troetschler, R. G., Kramer, S. J., Cesarin, B. J., Schooley, D. A. 1987  
808 Isolation and primary structure of the eclosion hormone of the tobacco hornworm, *Manduca*  
809 *sexta*. *Biochem Biophys Res Commun*. **146**, 746-750.
- 810 35 Zhou, L., Li, S., Wang, Z., Li, F., Xiang, J. 2017 An eclosion hormone-like gene  
811 participates in the molting process of Palaemonid shrimp *Exopalaemon carinicauda*. *Dev*  
812 *Genes Evol*. **227**, 189-199. (10.1007/s00427-017-0580-9)
- 813 36 Ewer, J. 2005 Behavioral actions of neuropeptides in invertebrates: insights from  
814 *Drosophila*. *Horm Behav*. **48**, 418-429. (10.1016/j.yhbeh.2005.05.018)
- 815 37 Zitnan, D., Kim, Y. J., Zitnanova, I., Roller, L., Adams, M. E. 2007 Complex steroid-  
816 peptide-receptor cascade controls insect ecdysis. *Gen Comp Endocrinol*. **153**, 88-96.  
817 (10.1016/j.ygcen.2007.04.002)
- 818 38 Chang, J. C., Yang, R. B., Adams, M. E., Lu, K. H. 2009 Receptor guanylyl cyclases in  
819 Inka cells targeted by eclosion hormone. *Proc Natl Acad Sci U S A*. **106**, 13371-13376.  
820 (10.1073/pnas.0812593106)
- 821 39 McNabb, S. L., Baker, J. D., Agapite, J., Steller, H., Riddiford, L. M., Truman, J. W. 1997  
822 Disruption of a behavioral sequence by targeted death of peptidergic neurons in *Drosophila*.  
823 *Neuron*. **19**, 813-823.
- 824 40 Kruger, E., Mena, W., Lahr, E. C., Johnson, E. C., Ewer, J. 2015 Genetic analysis of  
825 Eclosion hormone action during *Drosophila* larval ecdysis. *Development*. **142**, 4279-4287.  
826 (10.1242/dev.126995)
- 827 41 Frickey, T., Lupas, A. 2004 CLANS: a Java application for visualizing protein families  
828 based on pairwise similarity. *Bioinformatics*. **20**, 3702-3704.  
829 (10.1093/bioinformatics/bth444)

- 830 42 Vogel, K. J., Brown, M. R., Strand, M. R. 2013 Phylogenetic investigation of Peptide  
831 hormone and growth factor receptors in five dipteran genomes. *Front Endocrinol (Lausanne)*.  
832 **4**, 193. (10.3389/fendo.2013.00193)
- 833 43 Roller, L., Yamanaka, N., Watanabe, K., Daubnerova, I., Zitnan, D., Kataoka, H., Tanaka,  
834 Y. 2008 The unique evolution of neuropeptide genes in the silkworm *Bombyx mori*. *Insect*  
835 *Biochem Mol Biol*. **38**, 1147-1157.
- 836 44 Hansen, K. K., Hauser, F., Williamson, M., Weber, S. B., Grimmelikhuijzen, C. J. 2011  
837 The *Drosophila* genes CG14593 and CG30106 code for G-protein-coupled receptors  
838 specifically activated by the neuropeptides CCHamide-1 and CCHamide-2. *Biochem Biophys*  
839 *Res Commun*. **404**, 184-189. (10.1016/j.bbrc.2010.11.089)
- 840 45 Ida, T., Takahashi, T., Tominaga, H., Sato, T., Sano, H., Kume, K., Ozaki, M., Hiraguchi,  
841 T., Shiotani, H., Terajima, S., *et al.* 2012 Isolation of the bioactive peptides CCHamide-1 and  
842 CCHamide-2 from *Drosophila* and their putative role in appetite regulation as ligands for G  
843 protein-coupled receptors. *Front Endocrinol (Lausanne)*. **3**, 177.  
844 (10.3389/fendo.2012.00177)
- 845 46 Farhan, A., Gulati, J., Grobets-Wilde, E., Vogel, H., Hansson, B. S., Knaden, M. 2013  
846 The CCHamide 1 receptor modulates sensory perception and olfactory behavior in starved  
847 *Drosophila*. *Sci Rep*. **3**, 2765. (10.1038/srep02765)
- 848 47 Ren, G. R., Hauser, F., Rewitz, K. F., Kondo, S., Engelbrecht, A. F., Didriksen, A. K.,  
849 Schjott, S. R., Sembach, F. E., Li, S., Sogaard, K. C., *et al.* 2015 CCHamide-2 Is an  
850 Orexigenic Brain-Gut Peptide in *Drosophila*. *PLoS One*. **10**, e0133017.  
851 (10.1371/journal.pone.0133017)
- 852 48 Veenstra, J. A. 2010 Neurohormones and neuropeptides encoded by the genome of *Lottia*  
853 *gigantea*, with reference to other mollusks and insects. *Gen Comp Endocrinol*. **167**, 86-103.  
854 (10.1016/j.ygcen.2010.02.010)
- 855 49 Oumi, T., Ukena, K., Matsushima, O., Ikeda, T., Fujita, T., Minakata, H., Nomoto, K.  
856 1995 The GGNG peptides: novel myoactive peptides isolated from the gut and the whole  
857 body of the earthworms. *Biochem Biophys Res Commun*. **216**, 1072-1078.  
858 (10.1006/bbrc.1995.2730)
- 859 50 Tatemoto, K., Carlquist, M., Mutt, V. 1982 Neuropeptide Y--a novel brain peptide with  
860 structural similarities to peptide YY and pancreatic polypeptide. *Nature*. **296**, 659-660.
- 861 51 Tatemoto, K. 1982 Neuropeptide Y: complete amino acid sequence of the brain peptide.  
862 *Proc Natl Acad Sci U S A*. **79**, 5485-5489.
- 863 52 Nassel, D. R., Wegener, C. 2011 A comparative review of short and long neuropeptide F  
864 signaling in invertebrates: Any similarities to vertebrate neuropeptide Y signaling? *Peptides*.  
865 **32**, 1335-1355. (10.1016/j.peptides.2011.03.013)
- 866 53 Reichmann, F., Holzer, P. 2016 Neuropeptide Y: A stressful review. *Neuropeptides*. **55**,  
867 99-109. (10.1016/j.npep.2015.09.008)
- 868 54 Haas, D. A., George, S. R. 1989 Neuropeptide Y-induced effects on hypothalamic  
869 corticotropin-releasing factor content and release are dependent on noradrenergic/adrenergic  
870 neurotransmission. *Brain Res*. **498**, 333-338.



- 871 55 Maule, A. G., Shaw, C., Halton, D. W., Thim, L., Johnston, C. F., Fairweather, I.,  
872 Buchanan, K. D. 1991 Neuropeptide-F - a Novel Parasitic Flatworm Regulatory Peptide from  
873 *Moniezia-Expansa* (Cestoda, Cyclophyllidea). *Parasitology*. **102**, 309-316.
- 874 56 Elphick, M. R., Mirabeau, O. 2014 The Evolution and Variety of RFamide-Type  
875 Neuropeptides: Insights from Deuterostomian Invertebrates. *Front Endocrinol (Lausanne)*. **5**,  
876 93. (10.3389/fendo.2014.00093)
- 877 57 Kanai, Y., Tanuma, S. 1992 Purification of a novel B cell growth and differentiation factor  
878 associated with lupus syndrome. *Immunol Lett*. **32**, 43-48.
- 879 58 Miura, K., Titani, K., Kurosawa, Y., Kanai, Y. 1992 Molecular cloning of nucleobindin, a  
880 novel DNA-binding protein that contains both a signal peptide and a leucine zipper structure.  
881 *Biochem Biophys Res Commun*. **187**, 375-380.
- 882 59 Gonzalez, R., Mohan, H., Unniappan, S. 2012 Nucleobindins: bioactive precursor proteins  
883 encoding putative endocrine factors? *Gen Comp Endocrinol*. **176**, 341-346.  
884 (10.1016/j.ygcen.2011.11.021)
- 885 60 Oh, I. S., Shimizu, H., Satoh, T., Okada, S., Adachi, S., Inoue, K., Eguchi, H., Yamamoto,  
886 M., Imaki, T., Hashimoto, K., *et al.* 2006 Identification of nesfatin-1 as a satiety molecule in  
887 the hypothalamus. *Nature*. **443**, 709-712. (10.1038/nature05162)
- 888 61 Dore, R., Levata, L., Lehnert, H., Schulz, C. 2017 Nesfatin-1: functions and physiology of  
889 a novel regulatory peptide. *J Endocrinol*. **232**, R45-R65. (10.1530/JOE-16-0361)
- 890 62 Sundarrajan, L., Blanco, A. M., Bertucci, J. I., Ramesh, N., Canosa, L. F., Unniappan, S.  
891 2016 Nesfatin-1-Like Peptide Encoded in Nucleobindin-1 in Goldfish is a Novel Anorexigen  
892 Modulated by Sex Steroids, Macronutrients and Daily Rhythm. *Sci Rep*. **6**, 28377.  
893 (10.1038/srep28377)
- 894 63 Otte, S., Barnikol-Watanabe, S., Vorbruggen, G., Hilschmann, N. 1999 NUCB1, the  
895 *Drosophila melanogaster* homolog of the mammalian EF-hand proteins NEFA and  
896 nucleobindin. *Mech Dev*. **86**, 155-158.
- 897 64 Burke, R. D., Angerer, L. M., Elphick, M. R., Humphrey, G. W., Yaguchi, S., Kiyama, T.,  
898 Liang, S., Mu, X., Agca, C., Klein, W. H., *et al.* 2006 A genomic view of the sea urchin  
899 nervous system. *Dev Biol*. **300**, 434-460. (10.1016/j.ydbio.2006.08.007)
- 900 65 Elphick, M. R., Rowe, M. L. 2009 NGFFFamide and echinotocin: structurally unrelated  
901 myoactive neuropeptides derived from neurophysin-containing precursors in sea urchins. *J*  
902 *Exp Biol*. **212**, 1067-1077. (10.1242/jeb.027599)
- 903 66 Mita, M., Yoshikuni, M., Ohno, K., Shibata, Y., Paul-Prasanth, B., Pitchayawasin, S.,  
904 Isobe, M., Nagahama, Y. 2009 A relaxin-like peptide purified from radial nerves induces  
905 oocyte maturation and ovulation in the starfish, *Asterina pectinifera*. *Proc Natl Acad Sci U S*  
906 *A*. **106**, 9507-9512. (10.1073/pnas.0900243106)
- 907 67 Elphick, M. R., Reeve, J. R., Jr., Burke, R. D., Thorndyke, M. C. 1991 Isolation of the  
908 neuropeptide SALMFamide-1 from starfish using a new antiserum. *Peptides*. **12**, 455-459.
- 909 68 Schally, A. V., Bowers, C. Y., Redding, T. W., Barrett, J. F. 1966 Isolation of thyrotropin  
910 releasing factor (TRF) from porcine hypothalamus. *Biochem Biophys Res Commun*. **25**, 165-  
911 169.

- 912 69 Boler, J., Enzmann, F., Folkers, K., Bowers, C. Y., Schally, A. V. 1969 The identity of  
913 chemical and hormonal properties of the thyrotropin releasing hormone and pyroglutamyl-  
914 histidyl-proline amide. *Biochem Biophys Res Commun.* **37**, 705-710.
- 915 70 Burgus, R., Dunn, T. F., Desiderio, D., Guillemin, R. 1969 [Molecular structure of the  
916 hypothalamic hypophysiotropic TRF factor of ovine origin: mass spectrometry demonstration  
917 of the PCA-His-Pro-NH<sub>2</sub> sequence]. *C R Acad Sci Hebd Seances Acad Sci D.* **269**, 1870-  
918 1873.
- 919 71 Guillemin, R., Yamazaki, E., Gard, D. A., Jutisz, M., Sakiz, E. 1963 *In Vitro* Secretion of  
920 Thyrotropin (TSH): Stimulation by a Hypothalamic Peptide (TRF). *Endocrinology.* **73**, 564-  
921 572. (10.1210/endo-73-5-564)
- 922 72 Bowers, C. R., Redding, T. W., Schally, A. V. 1965 Effect of thyrotropin releasing factor  
923 (TRF) of ovine, bovine, porcine and human origin on thyrotropin release *in vitro* and *in vivo*.  
924 *Endocrinology.* **77**, 609-616. (10.1210/endo-77-4-609)
- 925 73 Bauknecht, P., Jekely, G. 2015 Large-Scale Combinatorial Deorphanization of *Platynereis*  
926 Neuropeptide GPCRs. *Cell Rep.* **12**, 684-693. (10.1016/j.celrep.2015.06.052)
- 927 74 Wilber, J. F., Yamada, M., Kim, U. J., Feng, P., Carnell, N. E. 1992 The human prepro  
928 thyrotropin-releasing hormone (TRH) gene: cloning, characterization, hormonal regulation,  
929 and gene localization. *Trans Am Clin Climatol Assoc.* **103**, 111-119.
- 930 75 Mutt, V., Jorpes, J. E. 1968 Structure of Porcine Cholecystokinin-Pancreozymin .I.  
931 Cleavage with Thrombin and with Trypsin. *Eur J Biochem.* **6**, 156-&. (DOI 10.1111/j.1432-  
932 1033.1968.tb00433.x)
- 933 76 Johnson, L. P., Magee, D. F. 1965 Inhibition of Gastric Motility by a Commercial  
934 Duodenal Mucosal Extract Containing Cholecystokinin and Pancreozymin. *Nature.* **207**,  
935 1401-&. (DOI 10.1038/2071401a0)
- 936 77 Cooke, A. R. 1967 Effect of Pancreozymin Preparations on Gastric Secretion. *Nature.*  
937 **214**, 729-&. (DOI 10.1038/214729a0)
- 938 78 Jorpes, E., Mutt, V. 1966 Cholecystokinin and pancreozymin, one single hormone? *Acta*  
939 *Physiol Scand.* **66**, 196-202. (10.1111/j.1748-1716.1966.tb03185.x)
- 940 79 Beinfeld, M. C. 2006 CHAPTER 99 - CCK/Gastrin A2 - Kastin, Abba J. In *Handbook of*  
941 *Biologically Active Peptides*. (ed.^eds. pp. 715-720. Burlington: Academic Press.
- 942 80 Menschaert, G., Vandekerckhove, T. T., Baggerman, G., Landuyt, B., Sweedler, J. V.,  
943 Schoofs, L., Luyten, W., Van Criekinge, W. 2010 A hybrid, de novo based, genome-wide  
944 database search approach applied to the sea urchin neuropeptidome. *J Proteome Res.* **9**, 990-  
945 996. (10.1021/pr900885k)
- 946 81 Cameron, R. A., Samanta, M., Yuan, A., He, D., Davidson, E. 2009 SpBase: the sea  
947 urchin genome database and web site. *Nucleic Acids Res.* **37**, D750-754.  
948 (10.1093/nar/gkn887)
- 949 82 Yu, N., Nachman, R. J., Smagghe, G. 2013 Characterization of sulfakinin and sulfakinin  
950 receptor and their roles in food intake in the red flour beetle *Tribolium castaneum*. *Gen Comp*  
951 *Endocrinol.* **188**, 196-203. (10.1016/j.ygcen.2013.03.006)

- 952 83 Brazeau, P., Vale, W., Burgus, R., Ling, N., Butcher, M., Rivier, J., Guillemin, R. 1973  
953 Hypothalamic Polypeptide That Inhibits the Secretion of Immunoreactive Pituitary Growth  
954 Hormone. *Science*. **179**, 77.
- 955 84 Epelbaum, J. 1986 Somatostatin in the central nervous system: physiology and  
956 pathological modifications. *Prog Neurobiol*. **27**, 63-100.
- 957 85 Viollet, C., Lepousez, G., Loudes, C., Videau, C., Simon, A., Epelbaum, J. 2008  
958 Somatostatinergetic systems in brain: networks and functions. *Mol Cell Endocrinol*. **286**, 75-  
959 87. (10.1016/j.mce.2007.09.007)
- 960 86 Schlegel, W., Raptis, S., Harvey, R. F., Oliver, J. M., Pfeiffer, E. F. 1977 Inhibition of  
961 cholecystokinin-pancreozymin release by somatostatin. *Lancet*. **2**, 166-168.
- 962 87 Hayes, J. R., Johnson, D. G., Koerker, D., Williams, R. H. 1975 Inhibition of gastrin  
963 release by somatostatin in vitro. *Endocrinology*. **96**, 1374-1376. (10.1210/endo-96-6-1374)
- 964 88 Tostivint, H., Lihmann, I., Vaudry, H. 2008 New insight into the molecular evolution of  
965 the somatostatin family. *Mol Cell Endocrinol*. **286**, 5-17. (10.1016/j.mce.2008.02.029)
- 966 89 Veenstra, J. A. 2009 Allatostatin C and its paralog allatostatin double C: the arthropod  
967 somatostatins. *Insect Biochem Mol Biol*. **39**, 161-170. (10.1016/j.ibmb.2008.10.014)
- 968 90 Veenstra, J. A. 2016 Allatostatins C, double C and triple C, the result of a local gene  
969 triplication in an ancestral arthropod. *Gen Comp Endocrinol*. **230-231**, 153-157.  
970 (10.1016/j.ygcen.2016.04.013)
- 971 91 Li, B., Predel, R., Neupert, S., Hauser, F., Tanaka, Y., Cazzamali, G., Williamson, M.,  
972 Arakane, Y., Verleyen, P., Schoofs, L., *et al.* 2008 Genomics, transcriptomics, and  
973 peptidomics of neuropeptides and protein hormones in the red flour beetle *Tribolium*  
974 *castaneum*. *Genome Res*. **18**, 113-122. (10.1101/gr.6714008)
- 975 92 Stewart, M. J., Favrel, P., Rotgans, B. A., Wang, T., Zhao, M., Sohail, M., O'Connor, W.  
976 A., Elizur, A., Henry, J., Cummins, S. F. 2014 Neuropeptides encoded by the genomes of the  
977 Akoya pearl oyster *Pinctata fucata* and Pacific oyster *Crassostrea gigas*: a bioinformatic and  
978 peptidomic survey. *BMC Genomics*. **15**, 840. (10.1186/1471-2164-15-840)
- 979 93 Cardoso, J. C., Felix, R. C., Bergqvist, C. A., Larhammar, D. 2014 New insights into the  
980 evolution of vertebrate CRH (corticotropin-releasing hormone) and invertebrate DH44  
981 (diuretic hormone 44) receptors in metazoans. *Gen Comp Endocrinol*. **209**, 162-170.  
982 (10.1016/j.ygcen.2014.09.004)
- 983 94 Lee, H. R., Zandawala, M., Lange, A. B., Orchard, I. 2016 Isolation and characterization  
984 of the corticotropin-releasing factor-related diuretic hormone receptor in *Rhodnius prolixus*.  
985 *Cell Signal*. **28**, 1152-1162. (10.1016/j.cellsig.2016.05.020)
- 986 95 Chang, M. M., Leeman, S. E. 1970 Isolation of a sialogogic peptide from bovine  
987 hypothalamic tissue and its characterization as substance P. *J Biol Chem*. **245**, 4784-4790.
- 988 96 Studer, R. O., Trzeciak, A., Lergier, W. 1973 Isolierung und Aminosäuresequenz von  
989 Substanz P aus Pferdedarm. *Helvetica Chimica Acta*. **56**, 860-866.  
990 (10.1002/hlca.19730560307)
- 991 97 US, V. E., Gaddum, J. H. 1931 An unidentified depressor substance in certain tissue  
992 extracts. *J Physiol*. **72**, 74-87.

- 993 98 Satake, H., Ogasawara, M., Kawada, T., Masuda, K., Aoyama, M., Minakata, H., Chiba,  
994 T., Metoki, H., Satou, Y., Satoh, N. 2004 Tachykinin and tachykinin receptor of an ascidian,  
995 *Ciona intestinalis*: evolutionary origin of the vertebrate tachykinin family. *J Biol Chem.* **279**,  
996 53798-53805. (10.1074/jbc.M408161200)
- 997 99 Schoofs, L., Holman, G. M., Hayes, T. K., Nachman, R. J., De Loof, A. 1990  
998 Locustatachykinin I and II, two novel insect neuropeptides with homology to peptides of the  
999 vertebrate tachykinin family. *FEBS Lett.* **261**, 397-401.
- 1000 100 Jiang, H., Lkhagva, A., Daubnerova, I., Chae, H. S., Simo, L., Jung, S. H., Yoon, Y. K.,  
1001 Lee, N. R., Seong, J. Y., Zitnan, D., *et al.* 2013 Natalisin, a tachykinin-like signaling system,  
1002 regulates sexual activity and fecundity in insects. *Proc Natl Acad Sci U S A.* **110**, E3526-  
1003 3534. (10.1073/pnas.1310676110)
- 1004 101 Kawada, T., Satake, H., Minakata, H., Muneoka, Y., Nomoto, K. 1999 Characterization  
1005 of a novel cDNA sequence encoding invertebrate tachykinin-related peptides isolated from  
1006 the echiuroid worm, *Urechis uncinatus*. *Biochem Biophys Res Commun.* **263**, 848-852.  
1007 (10.1006/bbrc.1999.1465)
- 1008 102 Kanda, A., Iwakoshi-Ukena, E., Takuwa-Kuroda, K., Minakata, H. 2003 Isolation and  
1009 characterization of novel tachykinins from the posterior salivary gland of the common  
1010 octopus *Octopus vulgaris*. *Peptides.* **24**, 35-43.
- 1011 103 Kovac, J. R., Chrones, T., Preiksaitis, H. G., Sims, S. M. 2006 Tachykinin receptor  
1012 expression and function in human esophageal smooth muscle. *J Pharmacol Exp Ther.* **318**,  
1013 513-520. (10.1124/jpet.106.104034)
- 1014 104 Im, S. H., Takle, K., Jo, J., Babcock, D. T., Ma, Z., Xiang, Y., Galko, M. J. 2015  
1015 Tachykinin acts upstream of autocrine Hedgehog signaling during nociceptive sensitization in  
1016 *Drosophila*. *Elife.* **4**, e10735. (10.7554/eLife.10735)
- 1017 105 Kahsai, L., Kapan, N., Dirksen, H., Winther, A. M., Nassel, D. R. 2010 Metabolic stress  
1018 responses in *Drosophila* are modulated by brain neurosecretory cells that produce multiple  
1019 neuropeptides. *PLoS One.* **5**, e11480. (10.1371/journal.pone.0011480)
- 1020 106 Nassel, D. R. 1999 Tachykinin-related peptides in invertebrates: a review. *Peptides.* **20**,  
1021 141-158.
- 1022 107 Lee, J. H., Miele, M. E., Hicks, D. J., Phillips, K. K., Trent, J. M., Weissman, B. E.,  
1023 Welch, D. R. 1996 KiSS-1, a novel human malignant melanoma metastasis-suppressor gene.  
1024 *J Natl Cancer Inst.* **88**, 1731-1737.
- 1025 108 Messenger, S., Chatzidaki, E. E., Ma, D., Hendrick, A. G., Zahn, D., Dixon, J., Thresher,  
1026 R. R., Malinge, I., Lomet, D., Carlton, M. B., *et al.* 2005 Kisspeptin directly stimulates  
1027 gonadotropin-releasing hormone release via G protein-coupled receptor 54. *Proc Natl Acad*  
1028 *Sci U S A.* **102**, 1761-1766. (10.1073/pnas.0409330102)
- 1029 109 Copp, D. H., Cheney, B. 1962 Calcitonin-a hormone from the parathyroid which lowers  
1030 the calcium-level of the blood. *Nature.* **193**, 381-382.
- 1031 110 Potts, J. T., Jr., Niall, H. D., Keutmann, H. T., Brewer, H. B., Jr., Deftos, L. J. 1968 The  
1032 amino acid sequence of porcine thyrocalcitonin. *Proc Natl Acad Sci U S A.* **59**, 1321-1328.

- 1033 111 Foster, G. V., Baghdiantz, A., Kumar, M. A., Slack, E., Soliman, H. A., Macintyre, I.  
1034 1964 Thyroid Origin of Calcitonin. *Nature*. **202**, 1303-1305.
- 1035 112 Friedman, J., Raisz, L. G. 1965 Thyrocalcitonin: inhibitor of bone resorption in tissue  
1036 culture. *Science*. **150**, 1465-1467.
- 1037 113 Wendelaar Bonga, S. E., Pang, P. K. 1991 Control of calcium regulating hormones in the  
1038 vertebrates: parathyroid hormone, calcitonin, prolactin, and stanniocalcin. *Int Rev Cytol*. **128**,  
1039 139-213.
- 1040 114 Furuya, K., Milchak, R. J., Schegg, K. M., Zhang, J., Tobe, S. S., Coast, G. M.,  
1041 Schooley, D. A. 2000 Cockroach diuretic hormones: characterization of a calcitonin-like  
1042 peptide in insects. *Proc Natl Acad Sci U S A*. **97**, 6469-6474.
- 1043 115 Veenstra, J. A. 2014 The contribution of the genomes of a termite and a locust to our  
1044 understanding of insect neuropeptides and neurohormones. *Front Physiol*. **5**, 454.  
1045 (10.3389/fphys.2014.00454)
- 1046 116 Sekiguchi, T., Kuwasako, K., Ogasawara, M., Takahashi, H., Matsubara, S., Osugi, T.,  
1047 Muramatsu, I., Sasayama, Y., Suzuki, N., Satake, H. 2016 Evidence for Conservation of the  
1048 Calcitonin Superfamily and Activity-regulating Mechanisms in the Basal Chordate  
1049 *Branchiostoma floridae*: INSIGHTS INTO THE MOLECULAR AND FUNCTIONAL  
1050 EVOLUTION IN CHORDATES. *J Biol Chem*. **291**, 2345-2356.  
1051 (10.1074/jbc.M115.664003)
- 1052 117 Amara, S. G., Jonas, V., Rosenfeld, M. G., Ong, E. S., Evans, R. M. 1982 Alternative  
1053 RNA processing in calcitonin gene expression generates mRNAs encoding different  
1054 polypeptide products. *Nature*. **298**, 240-244.
- 1055 118 McLatchie, L. M., Fraser, N. J., Main, M. J., Wise, A., Brown, J., Thompson, N., Solari,  
1056 R., Lee, M. G., Foord, S. M. 1998 RAMPs regulate the transport and ligand specificity of the  
1057 calcitonin-receptor-like receptor. *Nature*. **393**, 333-339. (10.1038/30666)
- 1058 119 Evans, B. N., Rosenblatt, M. I., Mnayer, L. O., Oliver, K. R., Dickerson, I. M. 2000  
1059 CGRP-RCP, a novel protein required for signal transduction at calcitonin gene-related  
1060 peptide and adrenomedullin receptors. *J Biol Chem*. **275**, 31438-31443.  
1061 (10.1074/jbc.M005604200)
- 1062 120 Zandawala, M., Paluzzi, J. P., Orchard, I. 2011 Isolation and characterization of the  
1063 cDNA encoding DH(31) in the kissing bug, *Rhodnius prolixus*. *Mol Cell Endocrinol*. **331**,  
1064 79-88. (10.1016/j.mce.2010.08.012)
- 1065 121 Zandawala, M. 2012 Calcitonin-like diuretic hormones in insects. *Insect Biochem Mol*  
1066 *Biol*. **42**, 816-825. (10.1016/j.ibmb.2012.06.006)
- 1067 122 Nakabayashi, K., Matsumi, H., Bhalla, A., Bae, J., Mosselman, S., Hsu, S. Y., Hsueh, A.  
1068 J. 2002 Thyrostimulin, a heterodimer of two new human glycoprotein hormone subunits,  
1069 activates the thyroid-stimulating hormone receptor. *J Clin Invest*. **109**, 1445-1452.  
1070 (10.1172/JCI14340)
- 1071 123 Roch, G. J., Sherwood, N. M. 2014 Glycoprotein Hormones and Their Receptors  
1072 Emerged at the Origin of Metazoans. *Genome Biol Evol*. **6**, 1466-1479.  
1073 (10.1093/gbe/evu118)

- 1074 124 Sudo, S., Kuwabara, Y., Park, J. I., Hsu, S. Y., Hsueh, A. J. 2005 Heterodimeric fly  
1075 glycoprotein hormone-alpha2 (GPA2) and glycoprotein hormone-beta5 (GPB5) activate fly  
1076 leucine-rich repeat-containing G protein-coupled receptor-1 (DLGR1) and stimulation of  
1077 human thyrotropin receptors by chimeric fly GPA2 and human GPB5. *Endocrinology*. **146**,  
1078 3596-3604. (10.1210/en.2005-0317)
- 1079 125 Rocco, D. A., Paluzzi, J. P. 2016 Functional role of the heterodimeric glycoprotein  
1080 hormone, GPA2/GPB5, and its receptor, LGR1: An invertebrate perspective. *Gen Comp*  
1081 *Endocrinol.* **234**, 20-27. (10.1016/j.ygcen.2015.12.011)
- 1082 126 Cahoreau, C., Klett, D., Combarnous, Y. 2015 Structure function relationships of  
1083 glycoprotein hormones and their subunits' ancestors. *Front Endocrinol.* **6**, (ARTN 26  
1084 10.3389/fendo.2015.00026)
- 1085 127 Verleyen, P., Huybrechts, J., Baggerman, G., Van Lommel, A., De Loof, A., Schoofs, L.  
1086 2004 SIFamide is a highly conserved neuropeptide: a comparative study in different insect  
1087 species. *Biochem Biophys Res Commun.* **320**, 334-341. (10.1016/j.bbrc.2004.05.173)
- 1088 128 Yasuda, A., Yasuda-Kamatani, Y., Nozaki, M., Nakajima, T. 2004 Identification of  
1089 GYRKPPFNGSIFamide (crustacean-SIFamide) in the crayfish *Procambarus clarkii* by  
1090 topological mass spectrometry analysis. *Gen Comp Endocrinol.* **135**, 391-400.
- 1091 129 Verleyen, P., Huybrechts, J., Schoofs, L. 2009 SIFamide illustrates the rapid evolution in  
1092 Arthropod neuropeptide research. *Gen Comp Endocrinol.* **162**, 27-35.  
1093 (10.1016/j.ygcen.2008.10.020)
- 1094 130 Wegener, C., Gorbashov, A. 2008 Molecular evolution of neuropeptides in the genus  
1095 *Drosophila*. *Genome Biol.* **9**, R131. (10.1186/gb-2008-9-8-r131)
- 1096 131 Brezina, V., Bank, B., Cropper, E. C., Rosen, S., Vilim, F. S., Kupfermann, I., Weiss, K.  
1097 R. 1995 Nine members of the myomodulin family of peptide cotransmitters at the B16-ARC  
1098 neuromuscular junction of *Aplysia*. *J Neurophysiol.* **74**, 54-72.
- 1099 132 Hewes, R. S., Snowdeal, E. C., 3rd, Saitoe, M., Taghert, P. H. 1998 Functional  
1100 redundancy of FMRFamide-related peptides at the *Drosophila* larval neuromuscular junction.  
1101 *J Neurosci.* **18**, 7138-7151.
- 1102 133 Fujisawa, Y., Furukawa, Y., Ohta, S., Ellis, T. A., Dembrow, N. C., Li, L., Floyd, P. D.,  
1103 Sweedler, J. V., Minakata, H., Nakamaru, K., *et al.* 1999 The *Aplysia* Mytilus inhibitory  
1104 peptide-related peptides: Identification, cloning, processing, distribution, and action. *Journal*  
1105 *of Neuroscience.* **19**, 9618-9634.
- 1106 134 Lange, A. B., Bendena, W. G., Tobe, S. S. 1995 The Effect of the 13 Dip-Allatostatins  
1107 on Myogenic and Induced Contractions of the Cockroach (*Diploptera punctata*) Hindgut. *J*  
1108 *Insect Physiol.* **41**, 581-588. (Doi 10.1016/0022-1910(95)00008-I)
- 1109 135 Criscuolo, A., Gribaldo, S. 2010 BMGE (Block Mapping and Gathering with Entropy): a  
1110 new software for selection of phylogenetic informative regions from multiple sequence  
1111 alignments. *BMC evolutionary biology.* **10**, 1.
- 1112

1113 **Figure captions**

1114 **Figure 1:** Bilaterian animal phylogeny. The diagram shows i). the phylogenetic position of  
1115 the phylum Echinodermata in the ambulacrarian clade of the deuterostomes and ii)  
1116 relationships between the five extant classes of echinoderms, which include the focal class for  
1117 this study – the Ophiuroidea (e.g. *Ophionotus victoriae*).

1118

1119 **Figure 2:** Eclosion hormone (EH)-type peptides and receptors in echinoderms A) Partial  
1120 multiple sequence alignment of eclosion hormone-type precursor sequences, excluding the N-  
1121 terminal signal peptide; B) Cluster analysis of arthropod EH precursors, echinoderm EH-like  
1122 precursors, arthropod ion transport peptides (ITPs) and vertebrate atrial natriuretic peptides  
1123 shows that echinoderm EH-like precursors are more closely related to arthropod EH than ITP  
1124 C) Maximum likelihood and Bayesian phylogenetic analyses of membrane guanylate cyclase  
1125 receptors shows that EH-like receptors are found in echinoderms but are absent in vertebrates  
1126 as seen for the EH-like precursors. OGC1, 2, 3 and 4 are orphan guanylate cyclase receptors  
1127 found in arthropods [42]. Echinoderm EH-like receptors are clustered with arthropod EH  
1128 receptors, neuropeptide-like peptide 1-VQQ receptors (NPLP1-VQQ) and OGC1 receptors.  
1129 The inset shows the alternate topology obtained following Bayesian analysis. Species  
1130 names: *Ophionotus victoriae* (Ovic), *Asterias rubens* (Arub), *Strongylocentrotus*  
1131 *purpuratus* (Spur), *Drosophila melanogaster* (Dmel), *Bombyx mori* (Bmor) and *Pediculus*  
1132 *humanus corporis* (Pcor).

1133

1134 **Figure 3:** Multiple sequence alignments of A) CCHamide-type and B) Neuropeptide-F/Y-  
1135 type peptides. Species names: *Ophionotus victoriae* (Ovic), *Asterias rubens* (Arub),  
1136 *Apostichopus japonicus* (Ajap), *Drosophila melanogaster* (Dmel), *Apis mellifera* (Amel),  
1137 *Lottia gigantea* (Lgig), *Aplysia californica* (Acal), *Homo sapiens* (Hsap), *Ophiopsila aranea*  
1138 (Oara), *Amphiura filiformis* (Afil), *Patiria miniata* (Pmin), *Saccoglossus kowalevskii* (Skow),  
1139 *Branchiostoma floridae* (Bflo) and *Daphnia pulex* (Dpul).

1140

1141 **Figure 4:** Summary of neuropeptide precursors identified in *Ophionotus victoriae*, *Amphiura*  
1142 *filiformis* and *Ophiopsila aranea*. Neuropeptide precursors are classified based on the type of  
1143 G-protein coupled receptor (GPCR) their constituent peptides are predicted to activate (see  
1144 Mirabeau and Joly, 2013). Some peptides bind to receptors other than GPCRs and these are  
1145 grouped with peptides where the receptor is unknown. Ophiuroids have neuropeptide  
1146 precursors from up to 32 families. The number of putative mature peptides derived from each  
1147 precursor has been indicated along with the presence of amidation and pyroglutamation.

1148

1149 **Figure 5:** Multiple sequence alignments of mature peptides belonging to selected  
1150 neuropeptide families. A) corazonin alignment; B) gonadotropin-releasing hormone (GnRH)  
1151 alignment; C) orexin alignment; D) luqin alignment; E) vasopressin/oxytocin (VP/OT)  
1152 alignment; F) Ovnp18 alignment; G) melanin-concentrating hormone (MCH) alignment; H)  
1153 NP peptide alignment; I) pigment dispersing factor (PDF) alignment (see Figure S10 for a  
1154 multiple sequence alignment of PDF-type precursors). Species names: *Ophionotus victoriae*  
1155 (*Ovic*), *Asterias rubens* (*Arub*), *Strongylocentrotus purpuratus* (*Spur*), *Apostichopus*  
1156 *japonicus* (*Ajap*), *Saccoglossus kowalevskii* (*Skow*), *Branchiostoma floridae* (*Bflo*),  
1157 *Anopheles gambiae* (*Agam*), *Daphnia pulex* (*Dpul*), *Strigamia maritima* (*Smar*), *Lottia*  
1158 *gigantea* (*Lgig*) and *Homo sapiens* (*Hsap*).

1159

1160 **Figure 6:** Alignments of neuropeptides derived from precursors that exist in multiple forms  
1161 in ophiuroids. A) thyrotropin-releasing hormone (TRH) alignment; B) cholecystokinin  
1162 alignment; C) somatostatin alignment; D) corticotropin-releasing hormone (CRH) alignment.  
1163 Species names: *Ophionotus victoriae* (*Ovic*), *Asterias rubens* (*Arub*), *Strongylocentrotus*  
1164 *purpuratus* (*Spur*), *Apostichopus japonicus* (*Ajap*), *Branchiostoma floridae* (*Bflo*), *Homo*  
1165 *sapiens* (*Hsap*), *Drosophila melanogaster* (*Dmel*) and *Lottia gigantea* (*Lgig*).

1166



1167 **Figure 7:** Comparative analysis of ophiuroid tachykinin, kisspeptin and calcitonin-type  
1168 precursors and neuropeptides. A) Alignment of tachykinin-type peptides in *O. victoriae*  
1169 (Ophiuroidea) and *A. rubens* (Asteroidea); B) Schematic diagrams of the *O. victoriae* and *A.*  
1170 *rubens* tachykinin precursors showing the location of the signal peptide (SP) and predicted  
1171 neuropeptides (labelled 1 to 4); C) Alignments of the long and short forms of kisspeptin-type  
1172 neuropeptides in *O. victoriae*, *A. rubens* and *S. purpuratus* (Echinoidea) D) Schematic  
1173 diagrams of the *O. victoriae* and *A. rubens* kisspeptin precursors showing the locations of the  
1174 SP, short and long orthocopies and cysteine (C) residues; E) Alignment of calcitonin-type  
1175 peptides from *O. victoriae*, *A. rubens*, *S. purpuratus* and *A. japonicus* (Holothuroidea); F)  
1176 Predicted alternative splicing of the calcitonin gene in ophiuroids, with the location of the SP  
1177 and neuropeptides (CT1 and CT2) labelled. Species names: *Ophionotus victoriae* (Ovic),  
1178 *Asterias rubens* (Arub), *Strongylocentrotus purpuratus* (Spur) and *Apostichopus japonicus*  
1179 (Ajap).

1180

1181 **Figure 8:** Comparison of neuropeptide copy numbers across the Ophiuroidea for precursors  
1182 comprising multiple copies of neuropeptides. Neuropeptide precursors were mined from 52  
1183 ophiuroid transcriptomes, with the phylogeny adapted from O'Hara et al. (2014) [12].  
1184 Am\_laud: *Amphiophiura laudata*, Am\_spat: *Amphiophiura spatulifera*, Am\_cipu:  
1185 *Amphioplus cippus*, Am\_cten: *Amphioplus ctenacantha*, Am\_squa: *Amphipholis squamata*,  
1186 Am\_cons1: *Amphiura constricta* 1, Am\_cons2: *Amphiura constricta* 2, As\_love: *Asteronyx*  
1187 *loveni*, As\_bidw: *Asteroschema bidwillae*, As\_tubi: *Asteroschema tubiferum*, Ba\_hero:  
1188 *Bathypsectinura heros*, Cl\_cana: *Clarkcoma canaliculata*, Gl\_sp\_no: *Glaciacantha* sp nov,  
1189 Go\_pust: *Gorgonocephalus pustulatum*, Mi\_grac: *Microphiopholis gracillima*, Op\_fune:  
1190 *Ophiacantha funebris*, Op\_abys: *Ophiactis abyssicola*, Op\_resi: *Ophiactis resiliens*, Op\_savi:  
1191 *Ophiactis savignyi*, Op\_vall: *Ophiernus vallincola*, Op\_pilo: *Ophiocentrus pilosus*,  
1192 Op\_wend: *Ophiocoma wendtii*, Op\_oedi: *Ophiocreas oedipus*, Op\_tube: *Ophiocypris*  
1193 *tuberculosis*, Op\_appr: *Ophioderma appressum*, Op\_bisc: *Ophiolepis biscalata*, Op\_impr:

1194 *Ophiolepis impressa*, Op\_brev: *Ophioleuce brevispinum*, Op\_perf: *Ophiolimna perfida*,  
1195 Op\_prol: *Ophiologimus prolifer*, Op\_obst: *Ophiomoeris obstricta*, Op\_lyma: *Ophiomusium*  
1196 *lymani*, Op\_aust: *Ophiomyxa australis*, Op\_vivi: *Ophiomyxa* sp cf *vivipara*, Op\_fasc:  
1197 *Ophionereis fasciata*, Op\_reti: *Ophionereis reticulata*, Op\_scha: *Ophionereis schayeri*,  
1198 Op\_cyli: *Ophiopeza cylindrica*, Op\_filo: *Ophiophragmus filograneus*, Op\_wurd:  
1199 *Ophiophragmus wurdemanii*, Op\_liod: *Ophiophrura liodisca*, Op\_john: *Ophiophyscis johni*,  
1200 Op\_lame: *Ophioplax lamellosa*, Op\_iner: *Ophiopleura inermis*, Op\_plic: *Ophioplinthaca*  
1201 *plicata*, Op\_bisp: *Ophioplocus bispinosus*, Op\_macu: *Ophiopsammus maculata*, Op\_angu:  
1202 *Ophiothrix angulata*, Op\_caes: *Ophiothrix caespitosa*, Op\_exim\_1: *Ophiotreta eximia* 1,  
1203 Op\_exim\_2: *Ophiotreta eximia* 2, Op\_sp\_no: *Ophiura sp nov.*

1204

1205 **Figure 9:** A partial multiple sequence alignment of ophiuroid thyrotropin-releasing hormone  
1206 (TRH) precursors showing clade-specific gain/loss of neuropeptide copies. Mono- and di-  
1207 basic cleavage sites are highlighted in green, mature peptides in red with the glycine residue  
1208 for amidation in pink. Species have been grouped and coloured (clade A in purple, clade B in  
1209 blue and clade C in orange) based on the phylogeny determined by O'Hara et al. (2014) [12].

1210

1211 **Figure 10:** A partial multiple sequence alignment of ophiuroid F-type SALMFamide  
1212 precursors showing clade-specific gain/loss of neuropeptide copies. Di-basic cleavage sites  
1213 are highlighted in green, mature peptides in red with the glycine residue for amidation in  
1214 pink. Species have been grouped and coloured (clade A in purple, clade B in blue and clade C  
1215 in orange) based on the phylogeny determined by O'Hara et al. (2014) [12].

1216

### 1217 Supplementary files

1218 **Figure S1:** Alignment and phylogenetic analysis of nucleobindins (NUCB). A) Partial  
1219 sequence alignment (excludes the signal peptide) of NUCB precursors. The locations of

1220 *Homo sapiens* nesfatin-1, 2 and 3 are indicated. A dibasic cleavage site in *O. victoriae*  
1221 nesfatin-1 is marked in red. B) Phylogenetic analysis of NUCB precursors. Species names:  
1222 *Ophionotus victoriae* (Ovic), *Amphiura filiformis* (Afil), *Ophiopsila aranea* (Oara),  
1223 *Apostichopus japonicus* (Ajap), *Strongylocentrotus purpuratus* (Spur), *Homo sapiens* (Hsap),  
1224 *Mus musculus* (Mmus) and *Drosophila melanogaster* (Dmel).

1225

1226 **Figure S2:** *Ophionotus victoriae* neuropeptide precursor repertoire.

1227

1228 **Figure S3:** *Amphiura filiformis* neuropeptide precursor repertoire.

1229

1230 **Figure S4:** *Ophiopsila aranea* neuropeptide precursor repertoire.

1231

1232 **Figure S5:** Partial multiple sequence alignments of echinoderm representatives of A)  
1233 glycoprotein alpha 2 (GPA2)-type subunits and B) glycoprotein beta 5 (GPB5)-type subunits.  
1234 Species names: *Ophionotus victoriae* (Ovic), *Asterias rubens* (Arub), *Strongylocentrotus*  
1235 *purpuratus* (Spur) and *Apostichopus japonicus* (Ajap).

1236

1237 **Figure S6:** Partial multiple sequence alignments of echinoderm representatives of large  
1238 protein hormones. A) insulin/insulin-like growth factor; B) relaxin-like peptide; C) bursicon  
1239 (bursicon alpha); D) partner of bursicon (bursicon beta). Species names: *Ophionotus victoriae*  
1240 (Ovic), *Asterias rubens* (Arub), *Strongylocentrotus purpuratus* (Spur) and *Apostichopus*  
1241 *japonicus* (Ajap).

1242

1243 **Figure S7:** Multiple sequence alignment of echinoderm pedal peptides. Species names:  
1244 *Ophionotus victoriae* (Ovic), *Asterias rubens* (Arub), *Strongylocentrotus purpuratus* (Spur)  
1245 and *Apostichopus japonicus* (Ajap).

1246

1247 **Figure S8:** Multiple sequence alignments of echinoderm neuropeptide families. A) F-type  
1248 SALMFamide alignment; B) L-type SALMFamide alignment; C) AN peptide. Species  
1249 names: *Ophionotus victoriae* (Ovic), *Asterias rubens* (Arub), *Strongylocentrotus purpuratus*  
1250 (Spur) and *Apostichopus japonicus* (Ajap).

1251

1252 **Figure S9:** Multiple sequence alignment of predicted peptides derived from neuropeptide  
1253 precursor 27 in *Ophionotus victoriae* (Ovic), *Amphiura filiformis* (Afil), *Ophiopsila aranea*  
1254 (Oara) and *Apostichopus japonicus* (Ajap).

1255

1256 **Figure S10:** Multiple sequence alignment of pigment-dispersing factor-type precursors. Note  
1257 the conservation of cleavage sites (KR) immediately preceding the mature peptide as well as  
1258 the location of the mature peptide (C-terminal end of the precursor). Species names:

1259 *Ophionotus victoriae* (Ovic), *Asterias rubens* (Arub), *Aplysia californica* (Acal), *Platynereis*  
1260 *dumerilii* (Pdum), *Euperipatoides rowelli* (Erow), *Nilaparvata lugens* (Nlug), *Bombyx mori*  
1261 (Bmor) and *Drosophila melanogaster* (Dmel).

1262

1263 **Figure S11:** Multiple sequence alignments of neuropeptide precursors used to generate  
1264 Figure 8.

1265

1266 **Figure S12:** Partial nucleotide sequence of the *Ophionotus victoriae* neuropeptide Y/F  
1267 precursor.

1268

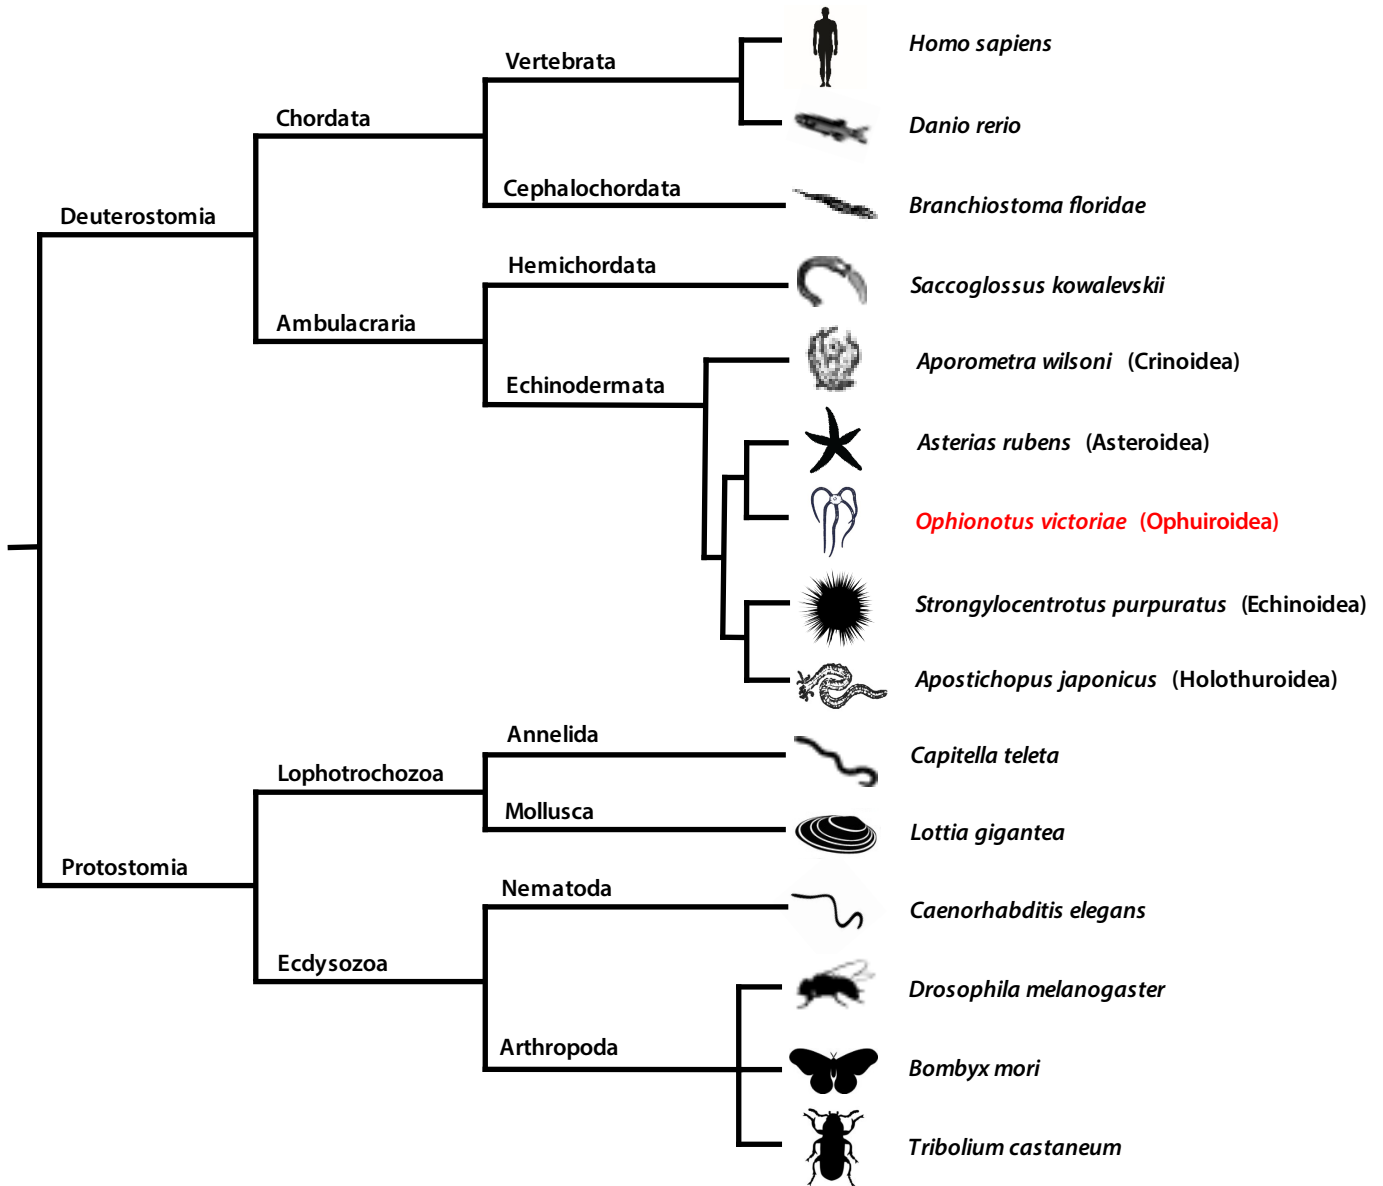

**A**

```

Ovic_1  --AAL-----LDIDEV-----DDTNAAF---ALNRLVQRRSDGNDVL----MER---
Ovic_2  --IPL-----LEAENN-----GLDRTAFNAETANIFNMARRTSLDLPGRGDFERQQR
Arub_1  --LPI-----DNE-----QSDPIFDHLYTRNIVERRS
Arub_2a --APFAE-----MAGDMS-----DEDSQLFESK-RVRDIISPLSHDLD-----
Arub_2b EWSPDNDNNNDHKRAQMSAH-----DWLNSLL--AGNDVGHAKT-----
Spur_1  APAPY-----FDEDAM-----DLMDPVFN--FKDDSAVKRS-----
Spur_2  --LPTYDKQNVDE-LQGDNDIDEQOLEMWDAMQGGDNDDEVSRRLTRG--GEAFS-----
Dmel
Bmor
Pcor
SILPTESNQ-----
  
```

bioRxiv preprint doi: <https://doi.org/10.1101/129783>; this version posted July 25, 2017. The copyright holder for this preprint (which was not certified by peer review) is the author/funder, who has granted bioRxiv a license to display the preprint in perpetuity. It is made available under aCC-BY-NC-ND 4.0 International license.

```

Ovic_1  TRRRRKSCLVRECVTCSFVYVITLVAIDVCSLSEVCSNLEPTIKSFDALNLTATKKGMLGGQ-----
Ovic_2  AKHVQLKICTLRCVSCNMEITG--YQFDHCLGGCRLGRKND-----NNCRRYITK-----
Arub_1  --RKDLTKCISECVSCAKYAG--LYADKCVRGCSKTSKGKIINKTEFD-AWSACEQFLHR-----
Arub_2a --KRKANLCAMDVCFKMI RN--VSPDQCVTGCKKSIDGSYS--YDRMWNRCSSYLTGRRR-----
Arub_2b --KRIAKACAIDCLNCGMMFQVQAYSQGDCLTACQNDNDNRD-----PSCHEHITM-----
Spur_1  --PMLQKSCIYTCCLACSKNTQ--MTMPECIYGCQSAGRDP SQAR-----AYNACHKYLHSGR-----
Spur_2  --RDRRRVCVSDCSFCHSFFPT--YKLGNCFHGCRKGFHD-----LGKQFRY-----
Dmel
Bmor
Pcor
--IDFVQVCLNNCVQCKTMLGD-YFQGTCA LSC LKFKGKAI-----PDCEDIASIA PFLNALE
--YDAMEIC IENCAQCKKMFGP-WFEGSLCAESC I KARGKDI-----PECESFASIS PFLNKL-
-----FGICIRNCAQCKKMFGT-YFEGQLCADACV KFKGKVI-----PDCEDLDSISPFLNKVD
  
```

**B**

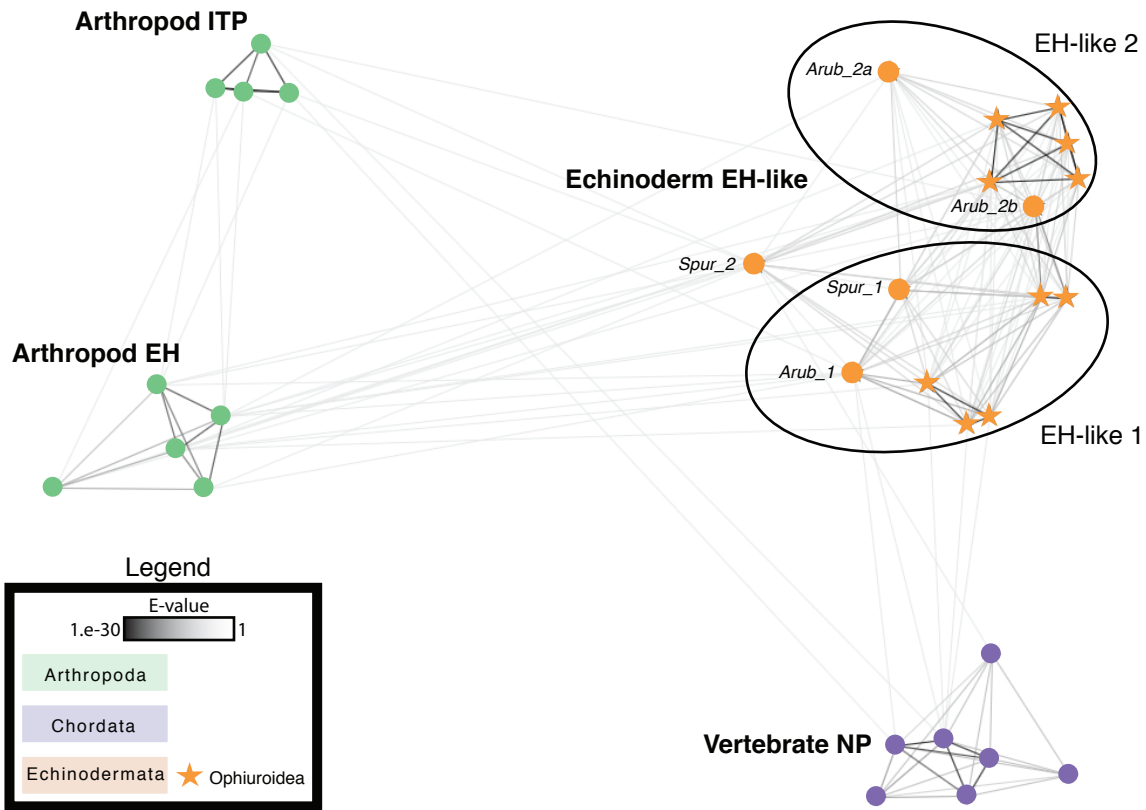

**C**

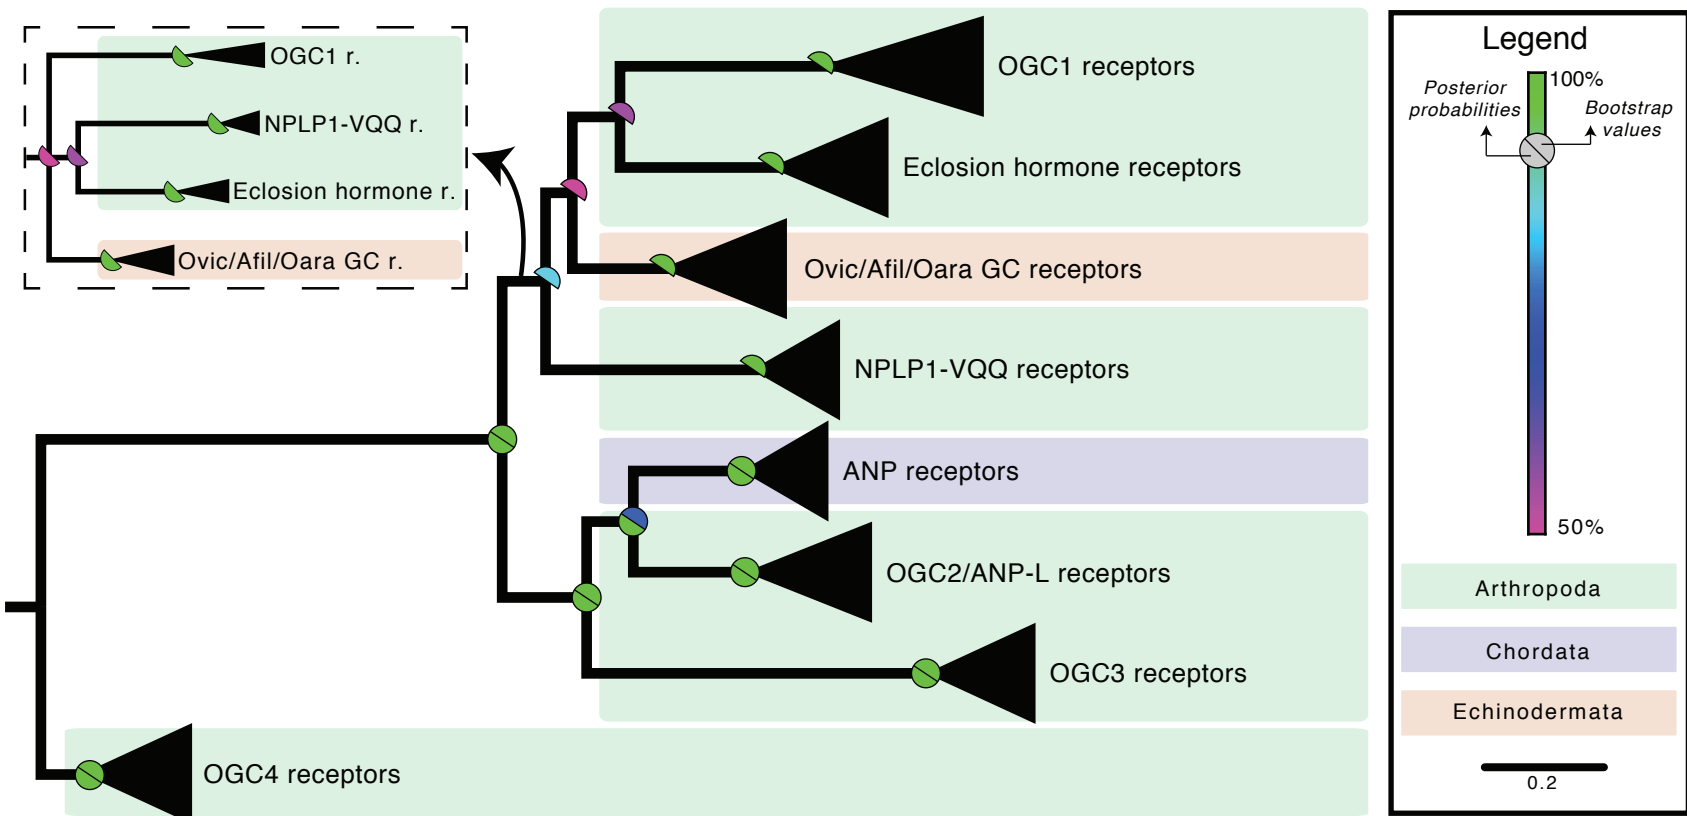

A

## CCHamide

|           |                            |
|-----------|----------------------------|
| Ovic1     | TN-HCKGRL--PKFCFLHPa       |
| Ovic2     | RG-ICSD----PLACGAAFa       |
| Arub      | SR-RCS-----VKGCMVHFa       |
| Ajap      | KS-ACSNRH--PKLCILHPa       |
| Dmel_CCH1 | ---SCLEY---GHSCWGAHa       |
| Dmel_CCH2 | ---GCQAY---GHVICYGGHa      |
| Amel_CCH1 | ---SCLSY---GHSCWGAHa       |
| Amel_CCH2 | ---GCSAF---GHSCFGGHa       |
| Lgig_GGNG | ---KCSGRWA-IHACFGGNa       |
| Acal_L11  | PRIDCTRFFV-APACRGVSA       |
| Amel_L11  | ESVNCELYPF-HHTCRGTMS       |
| Hsap_EDN3 | ----CTCFITYKDKECVYYCHLDIIW |
|           | * . . . * . .              |

B

## Neuropeptide-F/Y

|      |                                          |
|------|------------------------------------------|
| Oara | -----ATTGDKALDAILSGQY-RSHLRya            |
| Afil | -----ATTGDKALDAILSGQY-RHHLRya            |
| Arub | -----pQDRSKAMQAERTGQLRRLNPRFa            |
| Pmin | -----pQSDMRDKAMQAITTGQINRNHARYa          |
| Skow | DASDYQAPTAPSRGASLAEWDRYLRELSLYROYADIQRFa |
| Bflo | -----pQEEEDVEAPEEGKYKYNLANYLRLLRQRya     |
| Hsap | ---YPSKPDNPGEDAPAEDMARYYSALRHYNLITRQRya  |
| Dmel | ---SNSRPPRKNDVNTMADAYKFLQDLDTYYGDRARVRFa |
| Dpul | DGGDVMSGGEGGEMTAMADAIKYLOGLRRYDNSLVRPRFa |
| Lgig | pQDSMLAPPDRPSEFRSPDELRRYLKALNEYAIVGRPRFa |
|      | . . . . . . * . *                        |

| Receptor type      | Neuropeptide family             |                                   | <i>O. victoriae</i>            |                    |                                |                                | <i>A. lififormis</i> |                    |                                |                                | <i>O. aranea</i>     |                                |                      |                 |
|--------------------|---------------------------------|-----------------------------------|--------------------------------|--------------------|--------------------------------|--------------------------------|----------------------|--------------------|--------------------------------|--------------------------------|----------------------|--------------------------------|----------------------|-----------------|
|                    |                                 |                                   | Precursor                      | Predicted peptides | Amidated                       | Pyroglutaminate                | Precursor            | Predicted peptides | Amidated                       | Pyroglutaminate                | Precursor            | Predicted peptides             | Amidated             | Pyroglutaminate |
| Rhodopsin $\beta$  | 1                               | CCHamide-like 1                   |                                | 1                  |                                |                                | 1                    |                    |                                |                                | 1                    |                                |                      |                 |
|                    |                                 | CCHamide-like 2                   |                                | 1                  |                                | Partial / some mature peptides | 1                    |                    |                                |                                | 1                    |                                |                      |                 |
|                    | 2                               | Cholecystokinin 1                 |                                | 3                  |                                |                                | 3                    |                    |                                | Partial / some mature peptides | 1*                   |                                |                      |                 |
|                    |                                 | Cholecystokinin 2                 |                                | 1                  |                                |                                | 1                    |                    |                                |                                | 1                    |                                |                      |                 |
|                    | 3                               | Corazonin                         |                                | 1                  |                                |                                | 1                    |                    |                                |                                | 1                    |                                |                      |                 |
|                    | 4                               | Gonadotropin-releasing hormone    | Partial / some mature peptides | 1                  |                                |                                | 1                    |                    |                                |                                | 1                    |                                | Cannot be determined |                 |
|                    | 5                               | Luquin                            |                                | 1                  |                                |                                | 1                    |                    |                                |                                | 1                    |                                |                      |                 |
|                    | 6                               | Neuropeptide-F/Y 1                | Partial / some mature peptides | 1*                 |                                | Cannot be determined           | 1                    |                    |                                |                                | 1                    |                                |                      |                 |
|                    |                                 | Neuropeptide-F/Y 2                |                                | 1                  | Cannot be determined           |                                | 1                    |                    |                                |                                | 1                    | Cannot be determined           |                      |                 |
|                    | 7                               | NG peptide / Neuropeptide-S       |                                | 2                  |                                |                                | 2                    |                    |                                |                                | 2                    |                                |                      |                 |
|                    | 8                               | Orexin 1                          |                                | 1                  |                                |                                | 1                    |                    |                                |                                | 1                    |                                |                      |                 |
|                    | Orexin 2                        |                                   | 1                              |                    | Partial / some mature peptides | 1                              |                      |                    | Partial / some mature peptides | 1                              |                      | Partial / some mature peptides |                      |                 |
| 9                  | Tachykinin                      |                                   | 4                              |                    | Partial / some mature peptides | 4                              |                      |                    | Partial / some mature peptides | 4                              |                      | Partial / some mature peptides |                      |                 |
| 10                 | Thyrotropin-releasing hormone 1 |                                   | 21                             |                    | Partial / some mature peptides | 14*                            |                      |                    |                                | 17                             |                      | Cannot be determined           |                      |                 |
|                    | Thyrotropin-releasing hormone 2 |                                   | 4                              |                    | Partial / some mature peptides | 4*                             |                      |                    | Partial / some mature peptides | 1                              |                      | Cannot be determined           |                      |                 |
| 11                 | Vasopressin / Oxytocin          |                                   | 1                              |                    |                                | 1                              |                      |                    |                                | 1                              |                      |                                |                      |                 |
| Rhodopsin $\gamma$ | 12                              | Kisspeptin                        |                                | 2                  |                                | Partial / some mature peptides | 1*                   |                    |                                | Partial / some mature peptides | 1                    |                                |                      |                 |
|                    | 13                              | Melanin-concentrating hormone     |                                | 1                  |                                |                                | 1                    |                    |                                | 1                              |                      |                                |                      |                 |
|                    | 14                              | Somatostatin 1                    |                                | 1                  |                                |                                | 1                    |                    |                                |                                | 1                    |                                |                      |                 |
|                    |                                 | Somatostatin 2                    |                                | 1                  |                                |                                | 1                    |                    |                                |                                | 1                    |                                |                      |                 |
| Rhodopsin $\delta$ | 15                              | Bursicon alpha                    | Partial / some mature peptides | 1                  |                                |                                |                      |                    | Cannot be determined           |                                |                      | Cannot be determined           | Cannot be determined |                 |
|                    | 16                              | Bursicon beta                     |                                | 1                  |                                | Partial / some mature peptides | 1                    |                    |                                |                                |                      | Cannot be determined           | Cannot be determined |                 |
|                    | 17                              | Glycoprotein hormone alpha 2.1    |                                | 1                  |                                | Cannot be determined           | 1                    |                    |                                | Partial / some mature peptides | 1                    | Cannot be determined           | Cannot be determined |                 |
|                    |                                 | Glycoprotein hormone alpha 2.2    |                                | 1                  |                                |                                | 1                    |                    |                                | Partial / some mature peptides | 1                    | Cannot be determined           | Cannot be determined |                 |
|                    | 18                              | Glycoprotein hormone beta 5.1     |                                | 1                  |                                |                                | 1                    |                    |                                |                                | 1                    | Cannot be determined           | Cannot be determined |                 |
|                    | Glycoprotein hormone beta 5.2   |                                   | 1                              |                    |                                | 1                              |                      |                    |                                | 1                              | Cannot be determined | Cannot be determined           |                      |                 |
| 19                 | Relaxin-like peptide            |                                   | a                              |                    | Partial / some mature peptides | a                              |                      |                    | Cannot be determined           | a                              |                      | Partial / some mature peptides |                      |                 |
| Secretin           | 20                              | Calcitonin                        |                                | 2                  |                                |                                | 1/2                  |                    |                                | 1/2                            |                      |                                |                      |                 |
|                    | 21                              | Corticotropin-releasing hormone 1 |                                | 1                  |                                |                                | 1                    |                    |                                | 1                              |                      |                                |                      |                 |
|                    |                                 | Corticotropin-releasing hormone 2 |                                | 1                  |                                |                                | 1                    |                    |                                | 1                              |                      |                                |                      |                 |
|                    |                                 | Corticotropin-releasing hormone 3 | Partial / some mature peptides | 1*                 |                                |                                | 1                    |                    |                                |                                | 1                    |                                | Cannot be determined |                 |
|                    |                                 | Corticotropin-releasing hormone 4 | Partial / some mature peptides | 1*                 |                                | Partial / some mature peptides | 1*                   |                    |                                | Cannot be determined           | 1                    |                                | Cannot be determined |                 |
| 22                 | Pigment-dispersing factor       |                                   | 2                              |                    |                                | 2                              |                      |                    |                                | 2                              |                      |                                |                      |                 |
| Unknown / Others   | 23                              | AN peptide                        |                                |                    |                                | Partial / some mature peptides | 5*                   |                    |                                | 7                              |                      |                                |                      |                 |
|                    | 24                              | Eclosion hormone 1.1              |                                |                    |                                | Partial / some mature peptides | 1                    |                    |                                | 1                              |                      |                                |                      |                 |
|                    |                                 | Eclosion hormone 1.2              |                                | 1                  |                                |                                | 1                    |                    |                                | 1                              |                      |                                |                      |                 |
|                    |                                 | Eclosion hormone 2.1              |                                |                    |                                | Partial / some mature peptides | 1                    |                    |                                | 1                              |                      |                                |                      |                 |
|                    |                                 | Eclosion hormone 2.2              |                                | 1                  |                                |                                | 1                    |                    |                                | Partial / some mature peptides | 1                    |                                |                      |                 |
|                    | 25                              | Insulin-like peptide              | Partial / some mature peptides | a                  |                                |                                | a                    |                    |                                |                                | 1                    |                                | Cannot be determined |                 |
|                    | 26                              | Nucleobindin / Nefastin           | Partial / some mature peptides | b                  |                                |                                | b                    |                    |                                | Partial / some mature peptides | b                    |                                |                      |                 |
|                    | 27                              | Pedal peptide 1                   |                                | 6                  |                                | Partial / some mature peptides | c                    |                    |                                | Partial / some mature peptides | c                    |                                |                      |                 |
|                    |                                 | Pedal peptide 2                   | Partial / some mature peptides | 4*                 |                                |                                |                      |                    |                                | Cannot be determined           | 1*                   |                                | Cannot be determined |                 |
|                    |                                 | Pedal peptide 3                   | Partial / some mature peptides | 8*                 |                                |                                | c                    |                    |                                | Partial / some mature peptides | c                    |                                |                      |                 |
| 28                 | SALMFamide (L-type)             |                                   | 4                              |                    |                                | 4                              |                      |                    | Partial / some mature peptides | 4*                             |                      |                                |                      |                 |
| 29                 | SALMFamide (F-type)             |                                   | 12                             |                    | Partial / some mature peptides | 11                             |                      |                    | Partial / some mature peptides | 11                             |                      | Partial / some mature peptides |                      |                 |
| 30                 | Neuropeptide precursor 18       | Partial / some mature peptides    | 4                              |                    |                                | 2*                             |                      |                    |                                | 4                              |                      |                                |                      |                 |
| 31                 | Neuropeptide precursor 26       |                                   | 7                              |                    |                                | 8                              |                      |                    |                                | 8                              |                      |                                |                      |                 |
| 32                 | Neuropeptide precursor 27       |                                   | 2                              |                    | Partial / some mature peptides | 2                              |                      |                    | Partial / some mature peptides | 2                              |                      | Partial / some mature peptides |                      |                 |

■ Present

▨ Partial / some mature peptides

□ Absent

▤ Cannot be determined

a Heterodimer of A-chain and B-chain

b Number of mature peptides unknown

c Multiple partial precursors

bioRxiv preprint doi: <https://doi.org/10.1101/129783>; this version posted July 25, 2017. The copyright holder for this preprint (which was not certified by peer review) is the author/funder, who has granted bioRxiv a license to display the preprint in perpetuity. It is made available under aCC-BY-NC-ND 4.0 International license.





**A** TRH

|             |         |
|-------------|---------|
| Ovic1_1     | pQFSPAa |
| Ovic1_2-17  | pQFSAa  |
| Ovic1_18-21 | pQFAAa  |
| Ovic2_3-4   | pQGPRa  |
| Arub_1-12   | pQWYTa  |
| Spur_1-10   | pQYPGa  |
| Spur_11     | pQFPAAa |
| Spur_12-16  | pQWPGa  |
| Spur_17     | pQFPGa  |
| Ajap_1-10   | pQYFAa  |
| Ajap_11     | pQLPGAa |
| Ajap_12-15  | pQFFQa  |
| Ajap_16     | pQHfVa  |
| Ajap_17     | pQHFAa  |
| Ajap_18     | pQHFLa  |

\* . . \*

**B** Cholecystokinin

|         |                 |
|---------|-----------------|
| Ovic1_1 | ----SKDYGWGMaFa |
| Ovic1_2 | ----NKDYGWGMaFa |
| Ovic1_3 | ----NEYGWGHMfa  |
| Ovic2   | ----SLDYGFGMGfa |
| Arub1_1 | ---VDDYGHGLFWa  |
| Arub1_2 | --GGDDQYGFGLFFa |
| Spur1_1 | -----DYGHGMFFa  |
| Spur1_2 | ---PDDYNWGMWfa  |
| Spur1_3 | --DKADLYGWGGFFa |
| Spur2   | DAGPHAWYGTGM-Fa |
| Ajap1_1 | --MNGWY-TGM-Fa  |
| Ajap1_2 | --NIPQTYLSGDYFa |

. \* . . \* . \*

**C** Somatostatin

|           |                          |
|-----------|--------------------------|
| Ovic_1    | ---GKC- VGRFVP---YM-MNC- |
| Ovic_2    | ---PGC- VYDIWKGRGLS--RCT |
| Arub      | ---KC- IGRFQP---FS-MPC-  |
| Spur_1    | ---GKC- MGRFGP---YM-LNC- |
| Spur_2    | PARKIC- INDIWKGRGGG-LRCN |
| Ajap_2    | YNNRWCN LVDIWKGQGSNHRCR  |
| Bflo      | --AKGC- ARFYWKMPATA-MSC- |
| Hsap_SMS  | ---AGC- KNFFWK---TF-TSC- |
| Hsap_CORT | -DRMPC- RNFFWK---TF-SSC- |

\* . . . . \*

**D** CRH

|           |                                                      |
|-----------|------------------------------------------------------|
| Ovic_1    | -TGSPIALNPGLVVLDILRS--TIDNDRRR-QQMSEAAAMNSELFTRVa--  |
| Ovic_2    | -pQMNTDLF---TTFSVLRE--AFESAakNE-RDRASALAANGRLFAAGa-- |
| Ovic_3    | -pQMTVDPF---TTMQILRD--LHQTAEKE-RQRQKAIDINGRLFAAGa--  |
| Ovic_4    | -DNFEFGLF---TSLDILRD--AFQSAkSE-RERADALAANEDLLAAAa--  |
| Arub      | --pQGLSVS---PIFPiQRIR-LNAIERDR-QDQVDQAEANQGLFQIAa--  |
| Hsap_CRH  | SEEPPIsLD---LTFHLLRE--VLEMARAE--QLAQQAHSNRKLMEIIa--  |
| Hsap_UCN1 | -DNPSLSID---LTFHLLRT--LLELARTQ--SQRERAEQNRIIFDSVa--  |
| Hsap_UCN2 | ---IVLSLD---VPIGLLQI--LLEQARAR--AAREQATTNARILARVGHc  |
| Hsap_UCN3 | ---FTLSLD---VPTNIMNL--LFNIAKAK--NLRAQAAANAHLMAQIa--  |
| Dmel_DH44 | -NKPSLSIV---NPLDVLQRRLLEIARROMKENSROVELNRAILKNVa--   |
| Lgig_ELH1 | ---SRLSIN---QELKSLAN--LLVLRENK--RREAQKTKLRSKL-LSIa-- |
| Lgig_ELH2 | --AGRLSIN---GALSSlAD--LLVSENQR-RDRLESMElRQRl-QYLa--  |

. . . . . . . . . \*





# TRH-1

Am\_cipu SDDPFSDPKRQFSAGKRQFSAGKRQFSAGKRQFSAGKRQFSAGKRQWLGGE---YDPEE-----NLNMETRQFSAGKRQFSAGKR---  
Op\_angu VDMPET---RQFSAGKRQFSAGKRQFSAGKRQFSAGKRQFSAGKRQWVGGEEDDGLLENDDMKRQFSAGKRQFSAGKRQFSAGKRQFSAGKR---  
Op\_lame VDMPET---RQFSAGKRQFSAGKRQFSAGKRQFSAGKR-----QWVGGEPEE--WEDEDMKRQFSAGKRQFSAGKRQFSAGKRQFSAGKR---  
Op\_impr DDM-----KRQFSAGKRQFSAGKRQFSAGKRQFSAGKRQFSAGKRQWVGGFPLE--FEDEDVKRQFSAGKRQFSAGKRQFSAGKRQFSAGKR---  
Ba\_hero\_a VDMPET---RQFSAGKRQFSAGKRQFSAGKRQFSAGKR-----QWVGGEPD--VLNQDEKRQFSAGKRQFSAGKRQFSAGKRQFSAGKRQFS  
Ba\_hero\_b VDMPET---RQFSAGKRQFSAGKRQFSAGKRQFSAGKR-----QWVGGEPD--VLNQDEKRQFSAGKRQFSAGKRQFSAGKRQFSAGKRQFS  
Op\_vivi VDMPET---RQFSAGKRQFSAGKRQFSAGKRQFAAAGR-----QWVGGEPEDE--FD-EAQRQFSAGKRQFAAAGRQYAAGRQFTAGR---  
Op\_perf VDMPET---RQFSAGKRQFSAGKRQFSAGKRQFSAGKRQFSAGKRQWVGGEPE---DEEEEKRQFSAGKRQFSAGKRQFSAGKRQFSAGKR---  
Op\_exim\_1 VDMPET---RQFSAGKRQFSAGKRQFSAGKRQFSAGKR-----QWVGGQDDL--LDDEEEKRQFSAGKRQFSAGKRQFSAGKRQFSAGKR---  
Op\_liod\_a VDMPET---RQFSAGKRQFSAGKRQFSAGKRQFSAGKRQFSAGKRQWVGGESEDE--FEDEEEKRQFSAGKRQFSAGKRQFSAGKRQFSAGKR---  
Op\_liod\_b VDMPET---RQFSAGKRQFSAGKRQFSAGKRQFSAGKR-----QWVGGESEDE--FEDEEEKRQFSAGKRQFSAGKRQFSAGKRQFSAGKR---  
As\_bidw VDMPET---RQFSAGKRQFSAGKRQFSAGKRQFSAGKR-----EWMDDGPD--LEEEDKRQFSAGKRQFSAGKRQFSAGKRQFSAGKR---  
Op\_oedi VDMPET---RQFSAGKRQFSAGKRQFSAGKRQFSAGKR-----EWMDDGPNM--LEEEDKRQFSAGKRQFSAGKRQFSAGKRQFSAGKR---  
As\_love VDMPET---RQFSAGKRQFSAGKRQFSAGKRQFSAGKR-----EWM-DEPDM--LDEEDAKRQFSAGKRQFSAGKRQFSAGKRQFSAGKR---  
Op\_john VDMPQT---RQFSAGKRQFSAGKRQFSAGKRQFSAGKR-----QWIGGAED--ENEAAKRQFSAGKRQFSAGKRQFSAGKRQFSAGKR---  
Op\_lyma VDIPQT---RQFSAGKRQFSAGKRQFSAGKRQFSAGKR-----QWIGGEDD--ANEAAKRQFSAGKRQFSAGKRQFSAGKRQFSAGKR---

Am\_cipu ----QFSAGKRDWEEE--LTPEEL--MDMFQAPETRQFSAGKRQFSAGKRQFSAGKR-----QWVGGE--EYDPEEMLNMATRQFSAGKR---  
Op\_angu ----QFSAGKRDWEETELTPEEF--MDMILPAPETRQFSAGKRQFSAGKRQFSAGKR-----QWVGGD--LEYEPEEDLDMETRQFSAGKRQFS  
Op\_lame ----QFSAGKRDWEDE--LTPEDL--MDILPAPETRQFSAGKRQFSAGKRQFSAGKR-----QWVGGE--YNPDDMLDMET---  
Op\_impr ----QFSAGKRDWEE--LTPEDL--SDIVAAPETRQFSAGKRQFSAGKRQFSAGKR-----QWVGGM---ENPDDMLDMETRQFSAGKR---  
Ba\_hero\_a AGKRQFSAGKRDWEEENLTPQDLLALDMLPLPETRQFSAGKRQFSAGKR-----QWVGGE--LEYDPNEMLDMETRQFSAGKR---  
Ba\_hero\_b ----QFSAGKRDWEEENLTPQDLLALDMLPLPETRQFSAGKRQFSAGKR-----QWVGGE--LEYDPNEMLDMETRQFSAGKR---  
Op\_vivi ----QFSAGKRDWEEELTPEDLLALDMLPVPETRQFSAGKRQFSAGKRQFSAGKR-----QWVGGD--LEYNPEEMLDMETRQFSAGKR---  
Op\_perf ----QFSAGKRDWEEDNLTPQDLLALGMLPIPETRQFSAGKRQFSAGKRQFSAGKR-----QWVGGE--QEYDPEDMLDMETRQFSAGKR---  
Op\_exim\_1 ----QFSAGKRDWEEDLTPQDLLALEMLPLPETRQFSAGKRQFSAGKRQFSAGKR-----QWVGGE--QEYNPDDMLDMETRQFSAGKR---  
Op\_liod\_a ----QFSAGKREWDND--LTPEDLLAMGLLPAPETRQFSAGKRQFSAGKRQFSAGKR-----QWVGGE--LEYNPDMLMEARQFSAGKR---  
Op\_liod\_b ----QFSAGKREWDND--LTPEDLLAMGLLPAPETRQFSAGKRQFSAGKRQFSAGKR-----QWVGGE--LEYNPDMLMEARQFSAGKR---  
As\_bidw ----QFSAGKRDWEQD--LTPEDYLAMEMLPAPETRQFSAGKRQFSAGKRQFSAGKRQFSAGKRQWVGGD---YDPEELLDMETRQFSAGKR---  
Op\_oedi ----QFSAGKRDWEQD--LTPEEYLAMEMLPAPETRQFSAGKRQFSAGKRQFSAGKRQFSAGKRQWVGGD---YDPEELLDMETRQFSAGKR---  
As\_love ----DWRQD--LTPPELLAMEMLPAPETRQFSAGKRQFSAGKRQFSAGKRQFSAGKRQWVGGE---YDPEELLNMEARQFSAGKR---  
Op\_john ----QFSAGKRDWEEH--LTPEEYLAMEMLPAPETRQFSAGKRQFAAAGRQFSAGKR-----QWIGGQEEQEYNPDDFLDMETRQFSAGKR---  
Op\_lyma ----QFSAGKRDWEQN--LNPEEYLAMEMLPAPETRQFSAGKRQFSAGKRQFSAGKR-----QWIGGDEGQEYNPDDFLDMATRQFSAGKR---

Am\_cipu ----QFSAGKRQFSAGKRQWVGGE--AFLPEMDTRQFSAGKRQFSAGKRQFSAGKRQFSAGKR-----DDGETNILDEILEAEPDLAE--E  
Op\_angu AGKRQFSAGKRQFSAGKRQWVG---DVLPEMETRQFSAGKRQFSAGKRQFSAGKRQFSAGKR-----D-ADTDILDQILNADTTEE---E  
Op\_lame ----RQFSAGKRQFSAGKRQFSAGKR-----D--ETNILDEIL--DPAADDALAE  
Op\_impr ----QFSAGKRQFSAGKRQWVGGMENPDDMLDMETRQFSAGKRQFSAGKRQFSAGKR-----D--ETNILDEILEADPAGEDALAE  
Ba\_hero\_a ----QFSAGKRQFSAGKRQWVG---DVLPEMDTRQFSAGKRQFSAGKRQFSAGKR-----D--ETNILDEILEADPAAENALAE  
Ba\_hero\_b ----QFSAGKRQFSAGKRQWVG---DVLPEMDTRQFSAGKRQFSAGKRQFSAGKR-----D--ETNILDEILEADPAAENALAE  
Op\_vivi ----QFSAGKRQFSAGKRQWVG---DALPEMETRQFSAGKRQFSAGKRQFSAGKR-----D--ETDILDEILQAEPEADAFSE  
Op\_perf ----QFSAGKRQFSAGKRQWVG---DVLPEMDTRQFSAGKRQFSAGKRQFSAGKR-----D--ETNILDEILDAPAAANALAE  
Op\_exim\_1 ----QFSAGKRQFSAGKRQWVG---DVLPEMDTRQFSAGKRQFSAGKRQFSAGKR-----D--VTNILEEILEAEPAAVDALAE  
Op\_liod\_a ----QFSAGKRQFSAGKRQFSAGKR-----D--ETNILDEILEAEPAAENALAE  
Op\_liod\_b ----QFSAGKRQFSAGKRQFSAGKR-----D--ETNILDEILEAEPAAENALAE  
As\_bidw ----QFSAGKRQISAGNRQWVG---EALPEMETRQFSAGKRQFSAGKRQFSAGKR-----D--ESNLIHEILNAEPAAANALAE  
Op\_oedi ----QFSAGKRQFSAGKRQWVG---EALPEMETRQFSAGKRQFSAGKRQFSAGKR-----D--ETNILDEILDAPAAANALAE  
As\_love ----QFSAGKRQWIGG---EALPDMETRQFSAGKRQFSAGKRQFSAGKR-----D--ETNILDEILAEPAVANALAE  
Op\_john ----QWIGG---DVIPDMETRQFSAGKRQFSAGKRQFSAGKRQFSAGKRQFAAAGRQD--DTNILDEFLEANPAENDALAE  
Op\_lyma ----QFNPKRQFSAGKRQWIGG---DAIPNEMETRQFSAGKRQFSAGKRQFSAGKR-----D--ETNILDEILENDPAAENALAE

# F-type SALMfa

Am\_cipu QLVRR-----SAQ--AKPVKLAGFAFGKR-GQLVRRSSDDQLMEEDET---EKFGALDAAFFTKRR---DPSALSAFSGFKRDPDM-GLNALTFFGKR-GMN  
 Op\_filo PLVRR-----SAQ--AKPVKLTGFQFQFKR-GQLEKRSADDKLMEEDET---EKFAALD-AFTFFKRR---DPSGLTAFSFGFKRDPDL-GLNALTFFGKR--MS  
 Mi\_grac PLVRR-----SAP--SKPVKLSGTFGFKR-AQLEKRSADDKLMEEDET---EKFAAFD-AFTFFKRR---DPSGLSAFSGFKRDPDT-RLSALTFFGKR-GMS  
 Am\_squa PLVRR-----SAQ--SKPVKLAGFAFGKR-GQLEKRSADDKLMEEDET---EKRALSS-AFTFFKRR---DPSGLSALTFFGFKRDPDM-GLSALTFFGKR-GMN  
 Op\_resi QLVRR-----SASSGAKPVKLAGFAFGKRAGQLVRRSSDDQLVEEDGA---EKFAAMD-AFTFFKRY---DPSGLSAFSGFKRDPDL-GLSALTFFGKR-GMN  
 Op\_abys SLVRR-----SASSGGSKPVKLAGFAFGKR-GQLVRRSSDDQLLEEDST---EKFAAMD-AFTFFKRM---SDPSGLSAFSGFKRDPDM-GLSALTFFGKR-GMT  
 Op\_angu QLVRR-----SAKSGGDKPVKLAGFAFGKR-GQPVKRSTNDELEEDGE---EKFAAMD-AFTFFKRI---SDQE-LSPFSFEKRDPT-GLSALTFFGKR-GMH  
 Op\_scha QLVRR-----SAGSGSKPVKLAGFAFGKR-GQLVRRSSDDQLEEEDEA---EKFAAMD-AFTFFKRL---SKDPSALSASFNGFKRDPDM-GLSALTFFGKR-GMD  
 Op\_lame QLVRR-----SAGAGSKPVKLAGFAFGKR-GQLVRRSSDDQLEEEDEA---EKFAAMD-AFTFFKRL---SNDPSALSASFNGFKRDPDM-GLSALTFFGKR-GMN  
 Op\_bisp QLVRR-----SAVAGSKPVKLAGFAFGKR-GQLVRRSSDDQLEEQDDA---EKFAAMD-AFTFFKRP---SGDPTGLSAFSGFKRDPDM-SLSALTFFGKR-GMD  
 Op\_brev QLVRR-----SAGAGSKPVKLAGFAFGKR-GQLVRRSSDDQLEEQTT---EKFRANLD-AFTFFKRR---AGD---LSAFSFGKRDPT---LSALTFFGKR-GMK  
 Ba\_hero QLVRR-----SAGAGNKPVKLAGFAFGKR-NQPVKRSSDDRTEEEE---NKFGAMD-AFTFFKRP---SGNPTGLSAFSGFKRREPVGSLTFFGKR-GMD  
 Op\_appr QLVRR-----SAGAGSKPVKLAGFAFGKR-NQPVKRSSDDRDEEEE---DKFGAMG-AFTFFKRP---SGNPSGLSAFSGFKRREPGLSALTFFGKR-GTD  
 Op\_vivi QPVRR-----SAGAGGKPVKLAGFAFGKR-NPLVKRSSDDKVEEQD---DKFGAMD-AFTFFKRPVSGDPSALSASFSGFKRDPVGSLSALTFFGKR-A-N  
 Op\_wend NLVRR-----SAGAGSKPVKLAGFAFGKR-NQPVKRSSDDQIEEEE---DKFGAMD-AFNFAKRP---SGDPSGLSAFSGFKRDPVGSLSALTFFGKR-AME  
 Op\_plic QLVRR-----SA---KPVKLAGFQFQFKR-GQPVKRSSDDQAHEEE---EKGRMD-AFAFKRRL---SGDPSALSASFSGFKRDPVSSLSALTFFGKR-GMD  
 Op\_perf QLVRR-----SAG--SKPVKLAGFAFGKR-GQPVKRSSDDQLQEED---EKFGALD-AFAFKRR---SGDPSALSASFSGFKRDPVSSLSALTFFGKR-GMD  
 Cl\_cana QLVRR-----SAGAGSKPVKLAGFAFGKR-GQPVKRSSDDQAQEEE---DKFGSMD-AFTFFKRL---SGGKSALSASFSGFKRDPVGSLSALTFFGKR-GMD  
 Op\_exim\_1 QLVRR-----SAGAGSKPVKLAGFAFGKR-NQPVKRSSDDQAQEEE---DKFGSMD-AFTFFKRL---PGDPSALSASFSGFKRDPVSSLSALTFFGKR-GMD  
 Op\_liod QLVRRSAS--SGSKPKMSGFAFGKRDVQLVRR-----SAGSSSKPVKLAGFAFGKR-SQPVKRSSDDQVEAQE---DKFGALD-AFHFKRRL---SNDPSGLSAFSGFKR-EPMGSLGLTFFGKR-GMD  
 Op\_prol QLVRR-----SAGAGSKPVKLAGFAFGKR-GQPVKRSSDDQA-EEE---DKFGALD-AFTFFKRL---SSDP---LSAFNFGKREPVSLSALTFFGKR-GMD  
 As\_tubi PLVRRSAG--AGAS-KMSGFAFGKRDSELVKR-----SA---GKPVKLAGFAFGKR-SQLVRRSSDNVAENEE---EKFGAMD-AFTFFKRL---SGDPSGLSTFSFGKRNPGTSLALTFFGKR-GMY  
 Op\_oedi PLVRRSAG--AGAS-KMSGFAFGKRDSELVKR-----SA---GKPVKLAGFAFGKR-SQLVRRSSDNVAENEE---EKFGAMD-AFTFFKRL---SGDPSGLSTFSFGKRNPGTSLALTFFGKR-GMY  
 Go\_pust PLVRRSAAKAAGSA-KMSGFVFGKRDSELVKR-----SASAGSKPVKLAGFAFGKR-SQLVRRSLDYEAENDE---EKFGAMN-AFTFFKRL---SSDP-----AAVTFEKR-GMN  
 As\_love QLVRRSAG--AGAA-KMSGFAFGKRDSEIVKR-----SAGARSKPVKLAGFAFGKR-SQLVRRSSDNEAENDE---EKFGARN-AFTFFKRL---SGNPSALSASFSGFKRREPVSLSALTFFGKR-GMN  
 Op\_john QLVRR-----SAG--SKPTKLAGFAFGKR-GQPVKRSSDNEAEDGQ---EKFGTMD-AFAFKRP---SGDPTGLSAFSGFKRDPMSLSALAFGKR-GMD  
 Op\_lyma PLVRR-----SAGAGSKPVKLAGFAFGKR--NPVKRSSDNEANDKE---EKFRPMD-AFAFKRP---SGDPTGLSAFSGFKRDPDLSLSALAFGKR-GMD

Am\_cipu PASGYSAFYFGKRQMDNLHAFSFGKR-GMDPSGLSAFSGFKRGRDPSALSASFSGKR-----MG-M-NAFTFFKREGL--E-EDGAFE-EENDD--EKFNQLSSLTGYTFGKR  
 Op\_filo P-SGYSAFYFGKRQMDNLHAFSFGKR-GMDPSSLSALTFFGKRGRDPSLSASFSGKR-----MG-M-NAFTFFKREDEL--E-EDGAFE-DENDD--EKFSRLSSLTGYTFGKR  
 Mi\_grac P-SGYSAFYFGKGRMDNLNAFSFGKR-GMDPSTLSAFSFGKRGRDPSALSASFSGKR-----MG-M-NAFTFFKREDEL--E-EDGAFE-EENDD--EKFRSRLSSLTGYTFGKR--SYSKR  
 Am\_squa P-SGYSAFYFGKGRMDNLNAFSFGKR-GMDPSGLSAFSGFKRGRDPSALSASFSGKR-----MG---PAFTFFKREDEL--EDGAFE-EENYD--EKFSRIGALTGLTYGKR  
 Op\_resi P-SGMSAFSFGKR-RMEPLSAFSGFKRGRDPSGLSAFSGFKRGRDPSGLSAFSGFKR-----MG-M-NAFTFFKREGG--EEEDPAFE-EENNN--EKFRAGYNGLSQTFGKR  
 Op\_abys P-SGMSAFSFGKR-RMEPLSAFSGFKRGRDPSGLSAFSGFKRGRDPLGLNAFSFGKR-----MG-M-NAFTFFKREGL--EEEDAAL--EEDNNDEKFRAGYNGLSQTFGKR  
 Op\_angu P-SSMSAFSFGKR-RMDPLSAFSGFKRAMDPAGLSAFSFGKRGMDPSALSASFSGKRGTPS-GLSAFSGFKR-----MG-M-NAFTFFKREGE--E-EETAFAKNTD--EKFRAGYNGLSQTFGKR  
 Op\_scha P-SGFSAFSFGKR-R-EPYSAFSGFKR-GMDPSALSASFSGKRRDPALSASFNGFKR-----MGMGTNAFTFFKREGL--EEDGAFE-EENQDEEKKGGYNGIAGYTFGKR  
 Op\_lame P-SGFSAFYFGKR-R-EPLSAFSGFKR-GMDPSALSASFSGKRRDPALSASFNGFKR-----ANMGTNAFTFFKRDLL--EEDGAFE-EENQDEEKKGGYNGISGYTFGKR  
 Op\_bisp P-SGFSAFSFGKR-R-DPFSALTFFGKR-GMDPSALSAYSFGKRRDPALSASFNGFKR-----MGGLTNAFTFFKRDAA--EEDGAFE-EDNND--EKRFNGISGYTFGKR  
 Op\_brev P-SAFDAFSFGKR-R-DPLSAFSGFKR-GMDPNALGAFSFGKRRD-NALGAFSFGKR-----GM-DAFTFFKRD--EEGAFE-DED--EKFRAYNPISAYTFGKR  
 Ba\_hero P-AGFSAFNFGKR-R-DPLSAFNFGKR-GMDPSGLSAFSGKRRDPAGLSAFSFGKRSRVP--SLSAFDFGKR--G-M-DAFTFFKREDL--D-EEGAFE-DENDD--EKRFNGISGYTFGKR  
 Op\_appr P-AGFSAFNFGKR-R-DPLSAFNFGKR-GMDATGLSAFSGKRRDPAGLSAFSFGKRSRVP--SLSAFDFGKR--G-M-DAFAFGKREDL--D-EDGAFE-DENED--EKRFNGISGYTFGKR  
 Op\_vivi P-SGFSAFNFGKR-R-DPLTAFNFGKR-AMDASGLSAFSGKRRDPSNGLSAFSGKRRMP--SLGAFDFGKR--G-M-DAFTFFKREEL--D-DEGAFE-EENED--EKRFNGISGYTFGKR  
 Op\_wend P-AGFSAFSFGKR-R-DPLGAFSFGKR-GMDASGLSAFNFGKRRDPTGLSAFSGKRRVP--SLSAFDFGKR--GRM-DAFAFGKREDL--EEEDGAFE-DENDN--EKRFNGISGYTFGKR  
 Op\_plic P-SGFSAFNFGKR-R-DPLGAFSFGKRRGMDATGLSAFSGKRRDPAAGLSAFSGKRRMP--SLSAFDFGKR--G-Y-DAFTFFKREGL--D-EEGAFE-EENDD--EKRFNGISGLTYGKR  
 Op\_perf P-SGFNAFNFGKR-R-DPLSAFNFGKRRGMDTGLSAFSGKRRDASGLSAFSGKRRMP--SLSAFDFGKR--G-F-DAFTFFKREGL--DEEGAF--DENDD--EKRFNGISGLTYGKR  
 Cl\_cana P-SGFSAFNFGKR-R-NPLSDFNLDKRRGMDASGLSAFSGKRRDPTGLSAFSGKRRMP--SLSAFDFGKR--G-M-DAFTFFKREGL--D-EEGAFE-EENDD--EKRFNGISGYTFGKR  
 Op\_exim\_1 P-SGFSAFNFGKR-R-DPLSAFNFGKRRGMDASGLSAFSGKRRDPAAGLSAFSFGKRRMP--SLSAFDFGKR--G-M-DAFTFFKREGL--D-EEGAFE-DENDD--EKRFNGISGYTFGKR  
 Op\_liod P-SGLGAFSFGKR-R-DPLGAFNFGKRRGMDPSGLSAFSGKRRDPTGLSAFSGKRRMP--SLSAFDFGKR--G-M-DAFTFFKREDM--D-EEGAFE-DENED--EKRFNGISGLTYGKR  
 Op\_prol P-SGFSAFSFGKR-R-DPLGAFNFGKRRGLDASGLSAFSGKRRDPSGMGAFSFGKRRMP--NLSAFDFGKR--G-M-DAFTFFKREDM--D-EEGAFE-GENDD--EKRFNGISGYTFGKR  
 As\_tubi P-SGLSAFNFGKR-R-DPLSTFSFGKR-GVE-SGLSAFNFGKRRYDQSGLSAFSFGKRRMPTGSLSAFNFGKR--G-M-NAFTFFKREDL--D-EEAFAE-DENND--EKRFNGMSGYTFGKR  
 Op\_oedi P-SGLSAFNFGKR-R-DPLSTFSFGKR-GME-SGLSAFNFGKRRYDQSGLSAFSFGKRRMPTGSLSAFNFGKR--G-M-NAFTFFKREDL--D-EEAFAE-DENND--EKRFNGMSGYTFGKR  
 Go\_pust P-SGISAFNFGKR-R-DPLSTFSFGKR-GMESTGLSAFNFGKRRYDQSGLSAFSFGKRRMPTGSLSAFNFGKR--G-M-NAFTFFKRYL--D-EEGAFG-DENKD--EKRFNGMSGYTFGKR  
 As\_love P-SALSAFNFGKR-R-DPLSAFSGKR-GMQ-SGLSAFNFGKRRYDENGLSSFSFGKRRMPTGSLSGFDFGKR--G-M-DAFTFFKREDL--N-EEGAFD-DENND--EKRFNGISGYTFGKR  
 Op\_john R-SGFNAFSFGKR-R-DPLSAFSGKR-GMD--RLNAFNFGKRRNLSGLSAFDFGKR-----G-M-DAFAFGKRENLD--D-EDGAFE-DED--EKRFNGISGLTYGKR  
 Op\_lyma P-SGFNAFSFGKR-R-DPLSAFSGKR-GMD--GLNAFNFGKRRDPSALSASFNGKRRMPMGSLSAFDFGKR--G-M-DAFAFGKREDL--D-EEGAFQ-DENDD--EKRFNGISGLTYGKR
